# Supplementary material for: Synthesis of New Ruthenium Complexes and Their Exploratory Study as Polymer Hybrid Composites in Organic Electronics
Source: MDPI journal article supplement (doi:10.3390/polym16101338), 2024-05-09

# Synthesis of new ruthenium complexes and their exploratory study as organic semiconductors

Ricardo Ballinas-Indilí <sup>1</sup>, María Elena Sánchez-Vergara <sup>2\*</sup>, Saulo C. Rosales-Amezcu <sup>3</sup>, Joaquín André Hernández Méndez <sup>2</sup>, Byron López-Mayorga <sup>4</sup>, René Miranda Ruvalcaba <sup>1</sup>, and Cecilio Álvarez-Toledano <sup>3</sup>

<sup>1</sup> Departamento de Ciencias Químicas, Facultad de Estudios Superiores Cuautitlán Campo 1, Universidad Nacional Autónoma de México, Avenida 1o de Mayo s/n, Colonia Santa María las Torres, Cuautitlán Izcalli 54740, Mexico; mirruv@yahoo.com.mx (R.M.-R.)

<sup>2</sup> Facultad de Ingeniería, Universidad Anáhuac México, Av. Universidad Anáhuac 46, Col. Lomas Anáhuac, Huixquilucan 52786, Mexico

<sup>3</sup> Instituto de Química, Universidad Nacional Autónoma de México, Circuito Exterior s/n, Ciudad Universitaria, Mexico City 04510, Mexico; cecilio@unam.mx (C.Á.-T.)

<sup>4</sup> Escuela de Química, Facultad de Ciencias Químicas y Farmacia, Universidad de San Carlos de Guatemala, 11 avenida, Ciudad de Guatemala 01012, Guatemala, byron.lopez@profesor.usac.edu.gt (B.L.-M)

\* Correspondence: elena.sanchez@anahuac.mx

## Content

|                                                                                                     |         |
|-----------------------------------------------------------------------------------------------------|---------|
| Ligand <b>1b</b> (FTIR, MS, Elemental analysis, <sup>1</sup> HNMR, <sup>13</sup> CNMR) .....        | S1-S5   |
| Complex <b>2a</b> (FTIR, MS, Elemental analysis, <sup>1</sup> HNMR, <sup>13</sup> CNMR) .....       | S6-S10  |
| Complex <b>2b</b> (FTIR, MS, Elemental analysis, <sup>1</sup> HNMR, <sup>13</sup> CNMR) .....       | S11-S15 |
| Complex <b>2c</b> (FTIR, MS, Elemental analysis, <sup>1</sup> HNMR, <sup>13</sup> CNMR, HSQC) ..... | S16-S21 |
| Complex <b>2d</b> (FTIR, MS, Elemental analysis, <sup>1</sup> HNMR, <sup>13</sup> CNMR, HSQC) ..... | S22-S26 |
| Complex <b>2e</b> (FTIR, MS, Elemental analysis, <sup>1</sup> HNMR, <sup>13</sup> CNMR) .....       | S27-S32 |

Figure S1: FTIR spectrum of ligand **1b**.

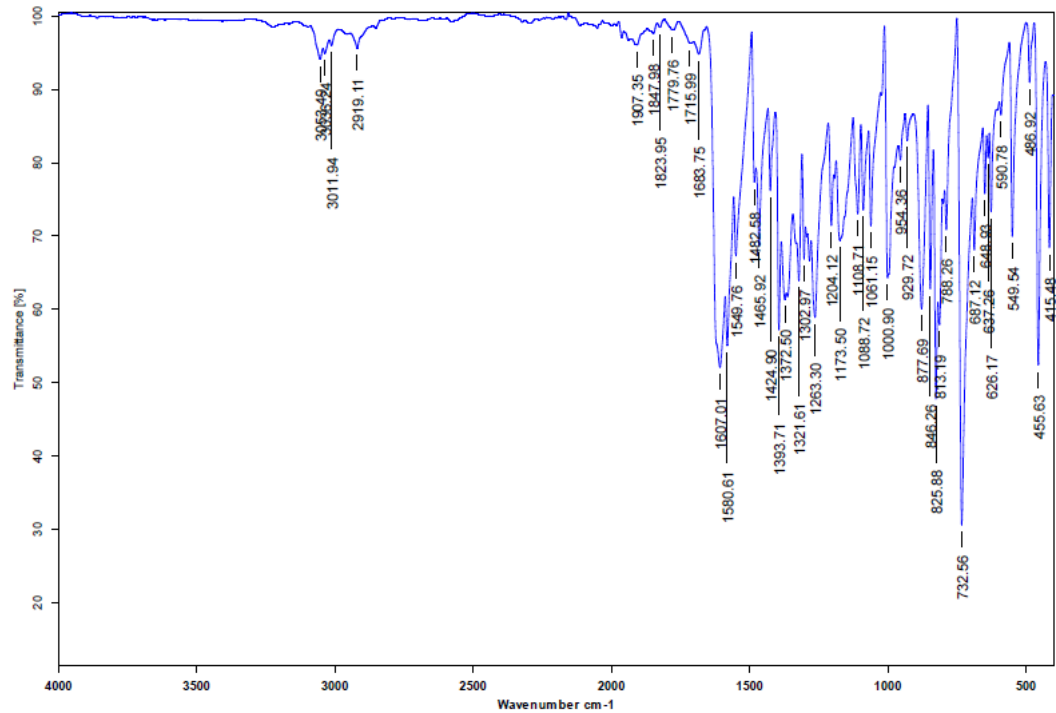

Figure S2: MS spectrum of ligand **1b**.

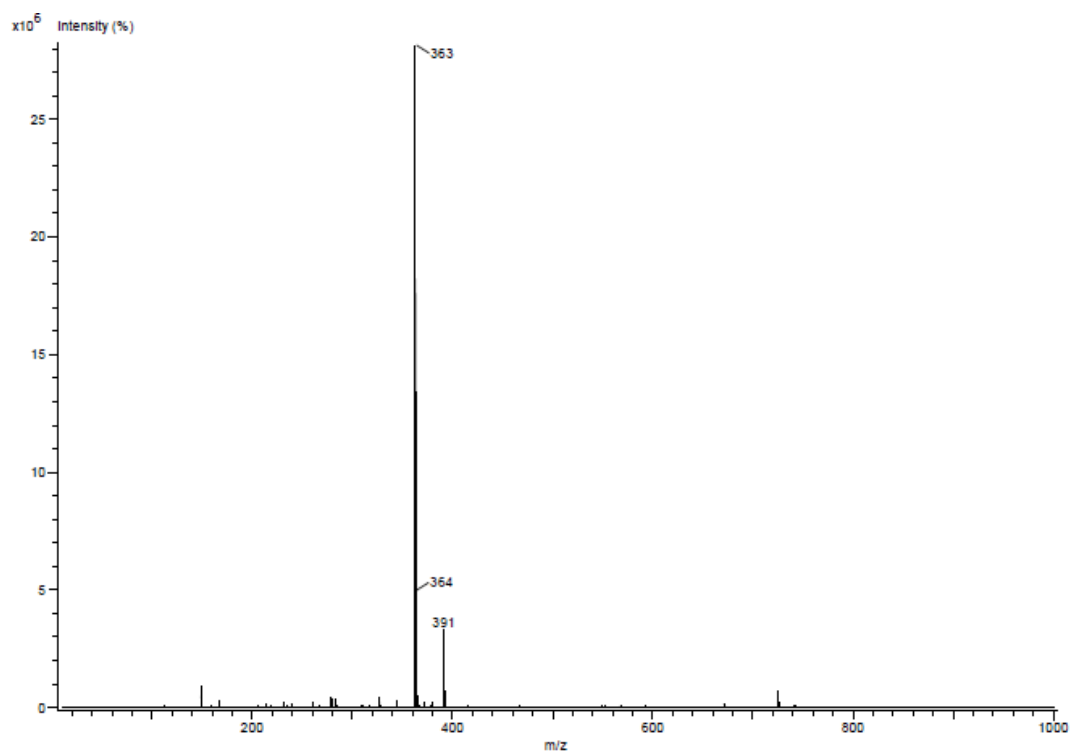

Figure S3: HRMS of ligand **1b**.

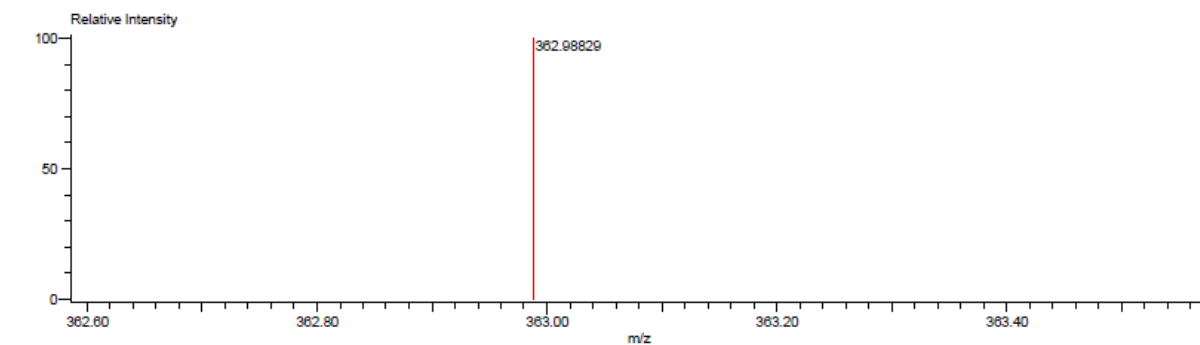

| Mass      | Intensity | Calc. Mass | Mass Difference (mmu) | Mass Difference (ppm) | Possible Formula                                                     | Unsaturation Number |
|-----------|-----------|------------|-----------------------|-----------------------|----------------------------------------------------------------------|---------------------|
| 362.98829 | 4215.56   | 362.98820  | 0.10                  | 0.27                  | $^{12}\text{C}_{15}^{1}\text{H}_{12}^{127}\text{I}_1^{16}\text{O}_2$ | 10.5                |

Figure S4:  $^1\text{H}$ -NMR spectrum of ligand **1b** in  $\text{CDCl}_3$  400 MHz.

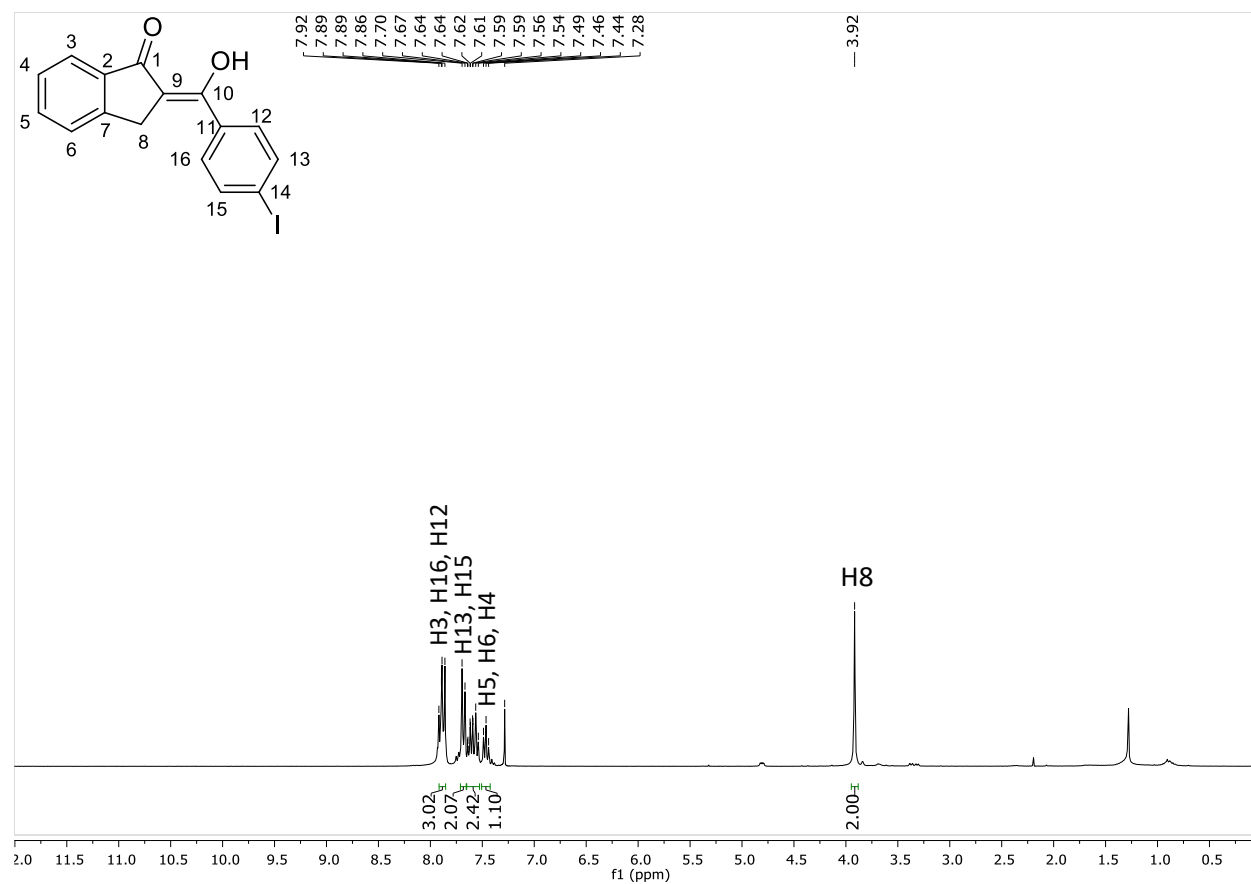

Figure S5:  $^{13}\text{C}$ -NMR spectrum of **1b** in  $\text{CDCl}_3$  400 MHz:

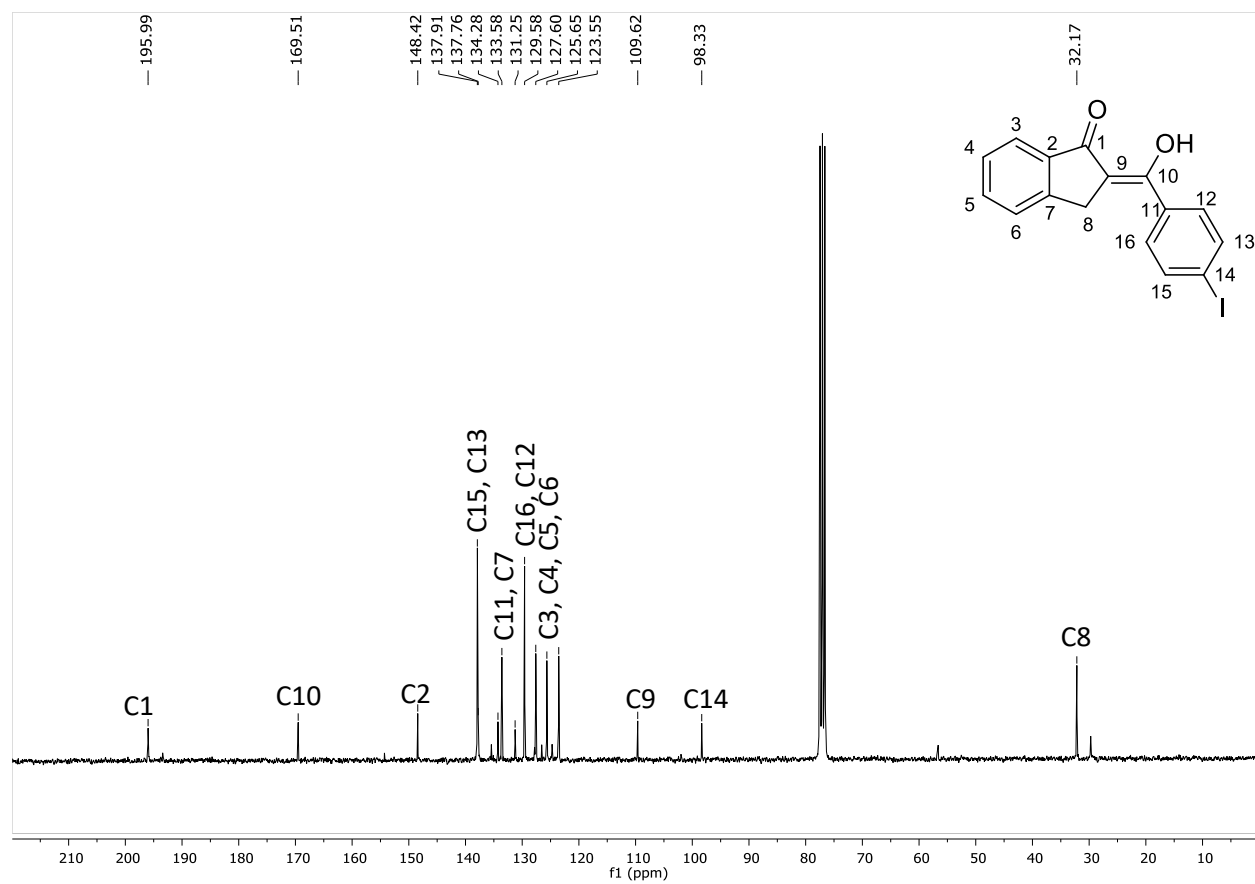

Figure S6: FTIR spectrum of complex **2a**.

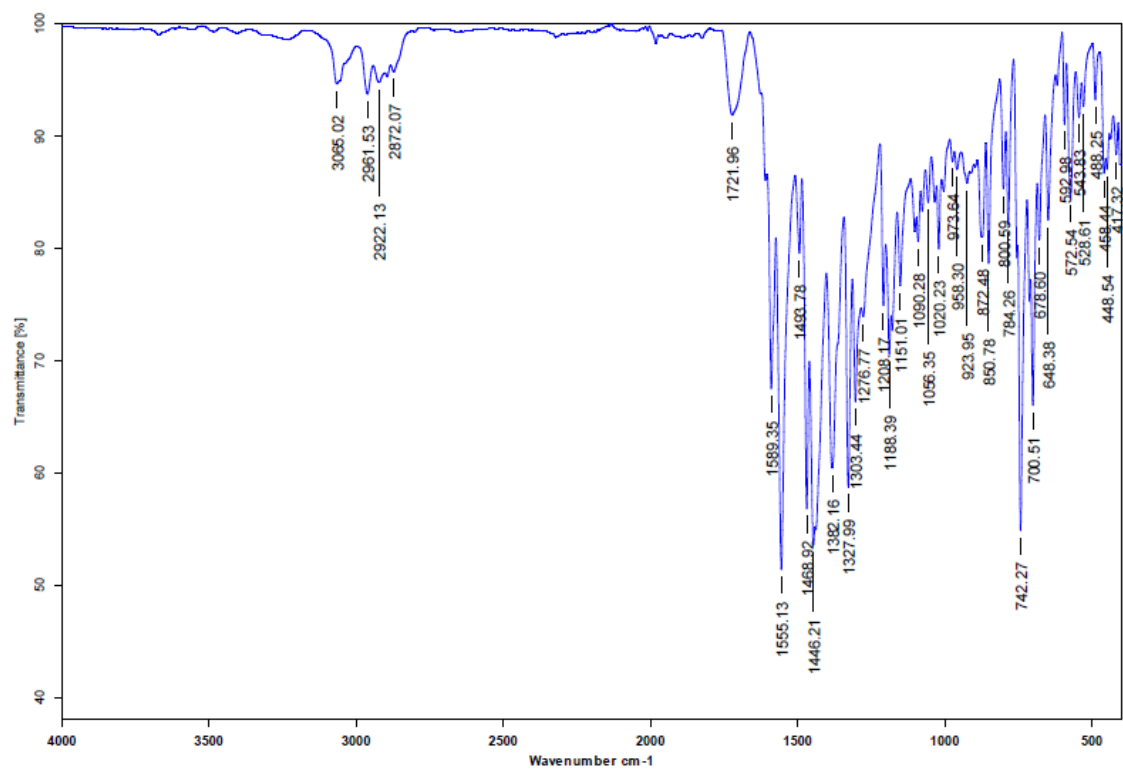

Figure S7: MS spectrum of complex **2a**.

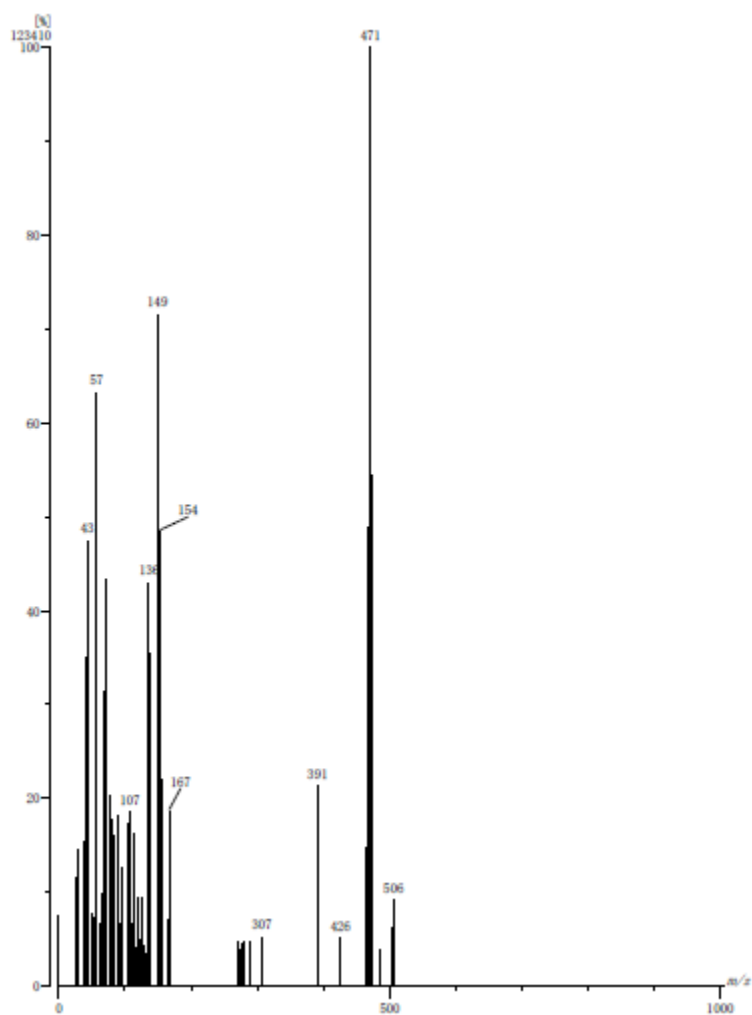

Figure S8: HRMS of complex **2a**.

Inlet : Direct      Ion Mode : FAB+  
 RT : 6.71 min      Scan# : (141,142)  
 Elements : C 26/0, H 29/0, Cl 1/0, O 2/0, Ru 1/0  
 Mass Tolerance : 1000ppm, 10mmu if  $m/z > 10$   
 Unsaturation (U.S.) : 0.0 – 20.0

| Observed $m/z$  |                 | Int%   |    |    |    |   |    |
|-----------------|-----------------|--------|----|----|----|---|----|
| 506.0600        |                 | 100.00 |    |    |    |   |    |
| Estimated $m/z$ | Err [ppm / mmu] | U.S.   | C  | H  | Cl | O | Ru |
| 1 506.0587      | +2.7 / +1.3     | 14.5   | 26 | 25 | 1  | 2 | 1  |

Figure S9:  $^1\text{H}$ -NMR spectrum of **2a** in  $\text{CDCl}_3$  400 MHz:

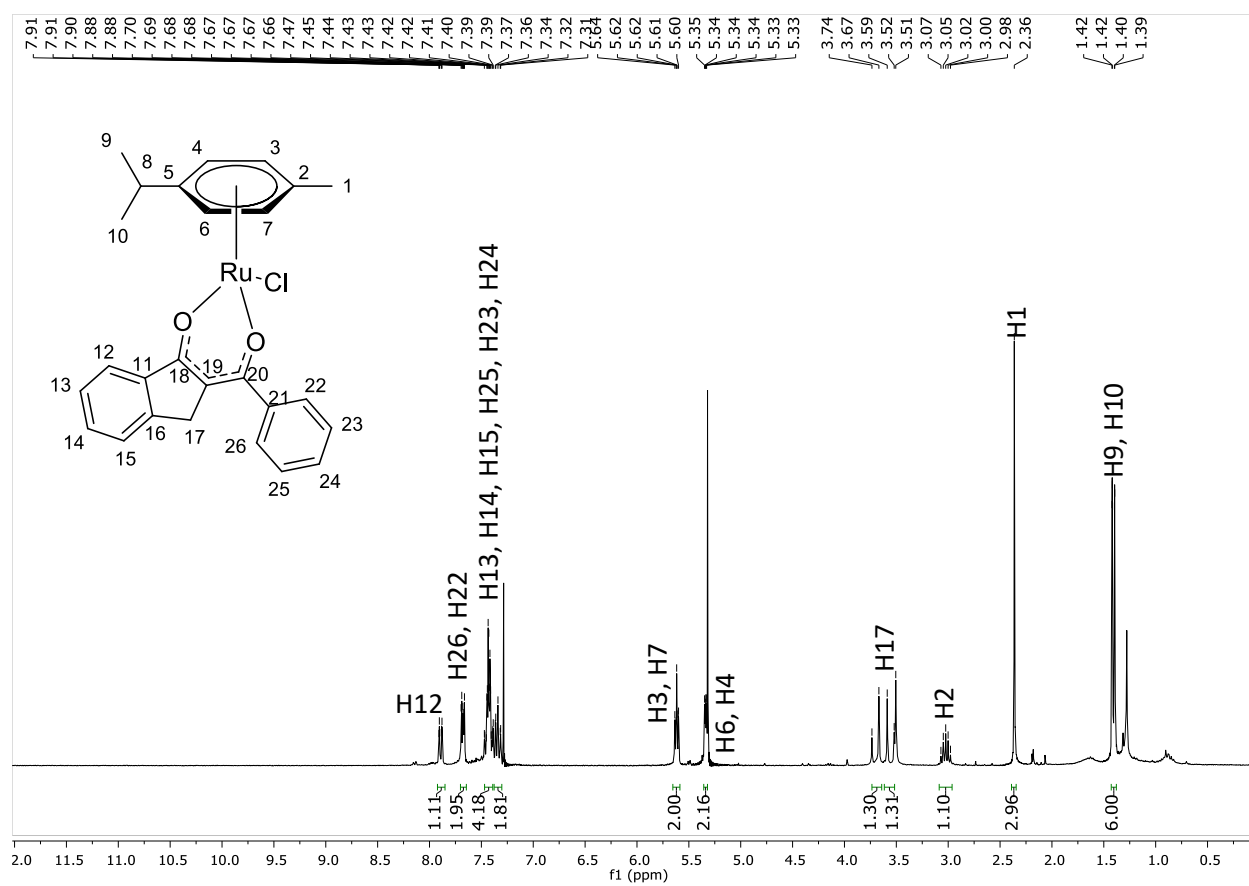



Figure S10:  $^{13}\text{C}$ -NMR spectrum of **2a** in  $\text{CDCl}_3$  400 MHz:

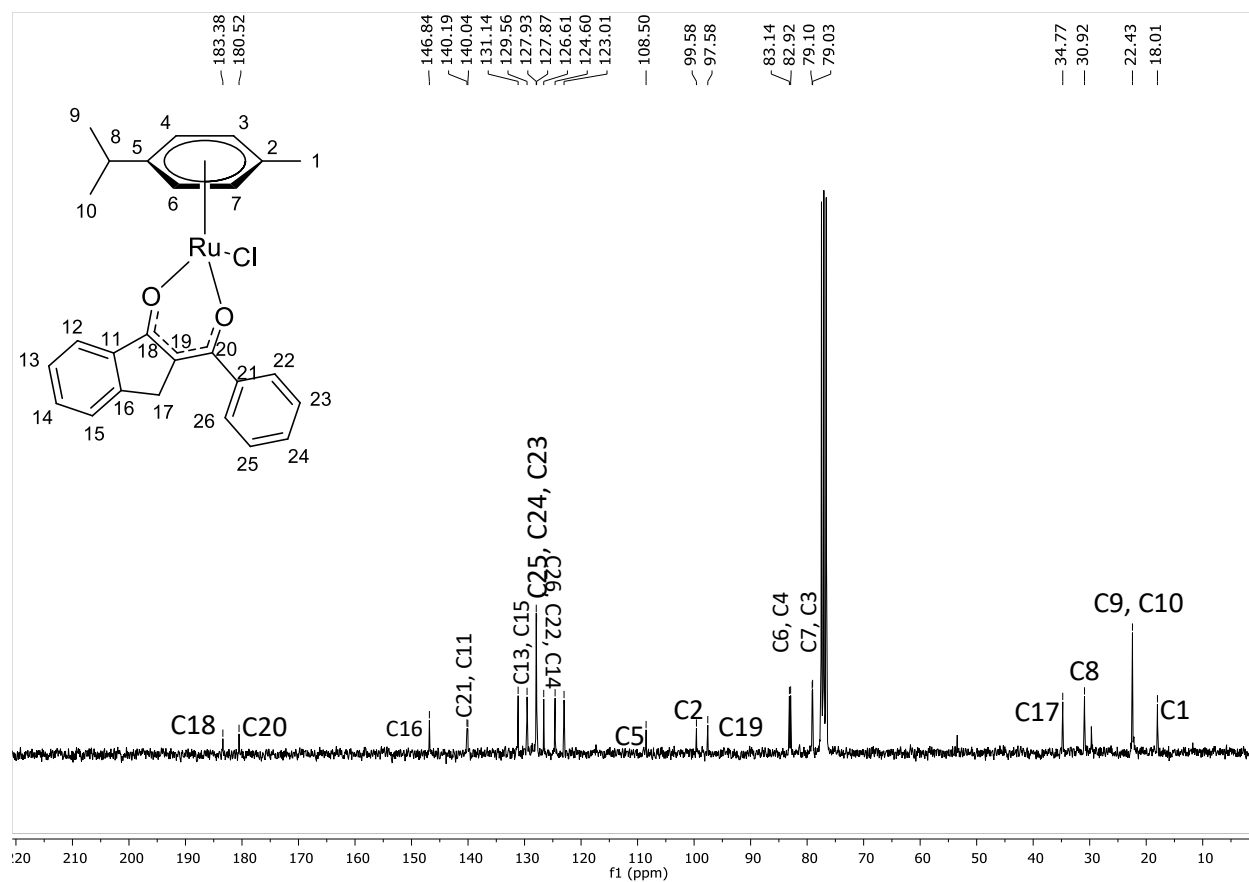

Figure S11: FTIR spectrum of complex **2b**.

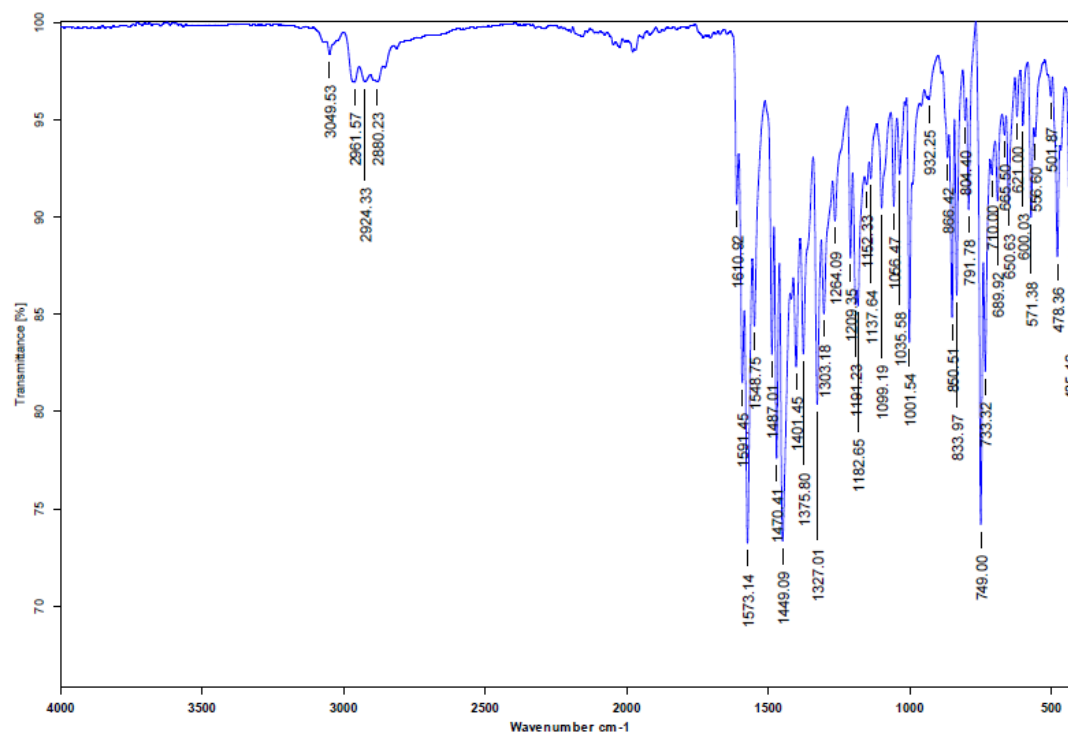

Figure S12: MS spectrum of complex **2b**.

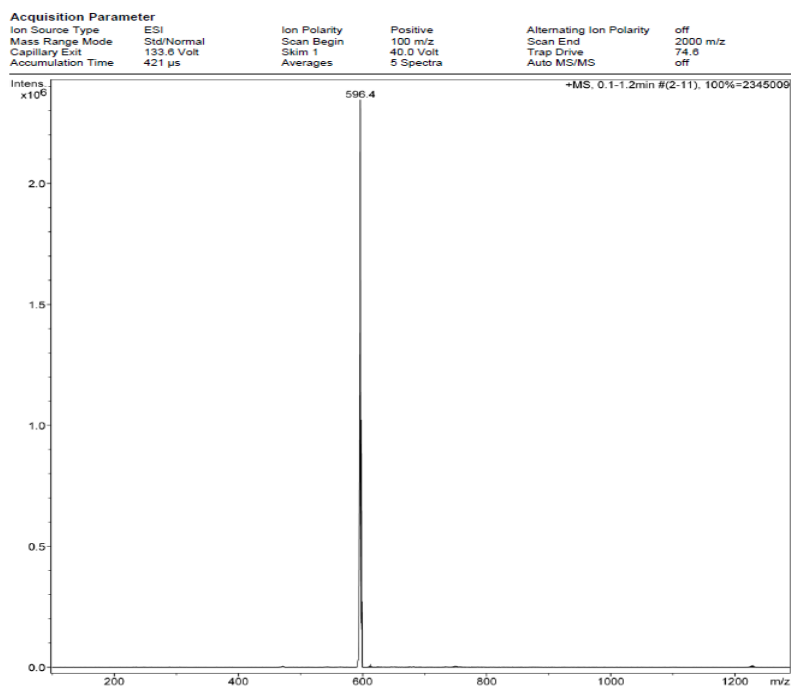

Figure S13: HRMS of complex **2b**.

|                     |      |                       |                             |
|---------------------|------|-----------------------|-----------------------------|
| <b>Sample Group</b> |      | <b>Info.</b>          |                             |
| <b>Stream Name</b>  | LC 1 | <b>Acquisition SW</b> | 6200 series TOF/6500 series |
|                     |      | <b>Version</b>        | Q-TOF B.06.01 (B6172 SP1)   |

#### User Spectra

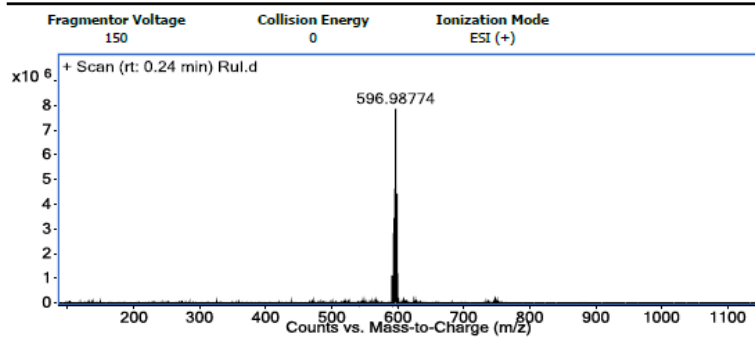

**Peak List**

| m/z       | z | Abund      |
|-----------|---|------------|
| 590.99089 | 1 | 1136845.02 |
| 592.98899 | 1 | 456021.35  |
| 593.9888  |   | 2844940.35 |
| 594.98802 |   | 3505012.05 |
| 595.98877 |   | 4640274.74 |
| 596.98774 | 1 | 8072395.01 |
| 597.17802 |   | 736918.85  |
| 597.99047 | 1 | 2234367.25 |
| 598.9884  | 1 | 4444355.6  |
| 599.99222 | 1 | 1228913.79 |

Figure S14:  $^1\text{H}$ -NMR spectrum of complex **2b** in  $\text{CDCl}_3$  400 MHz:

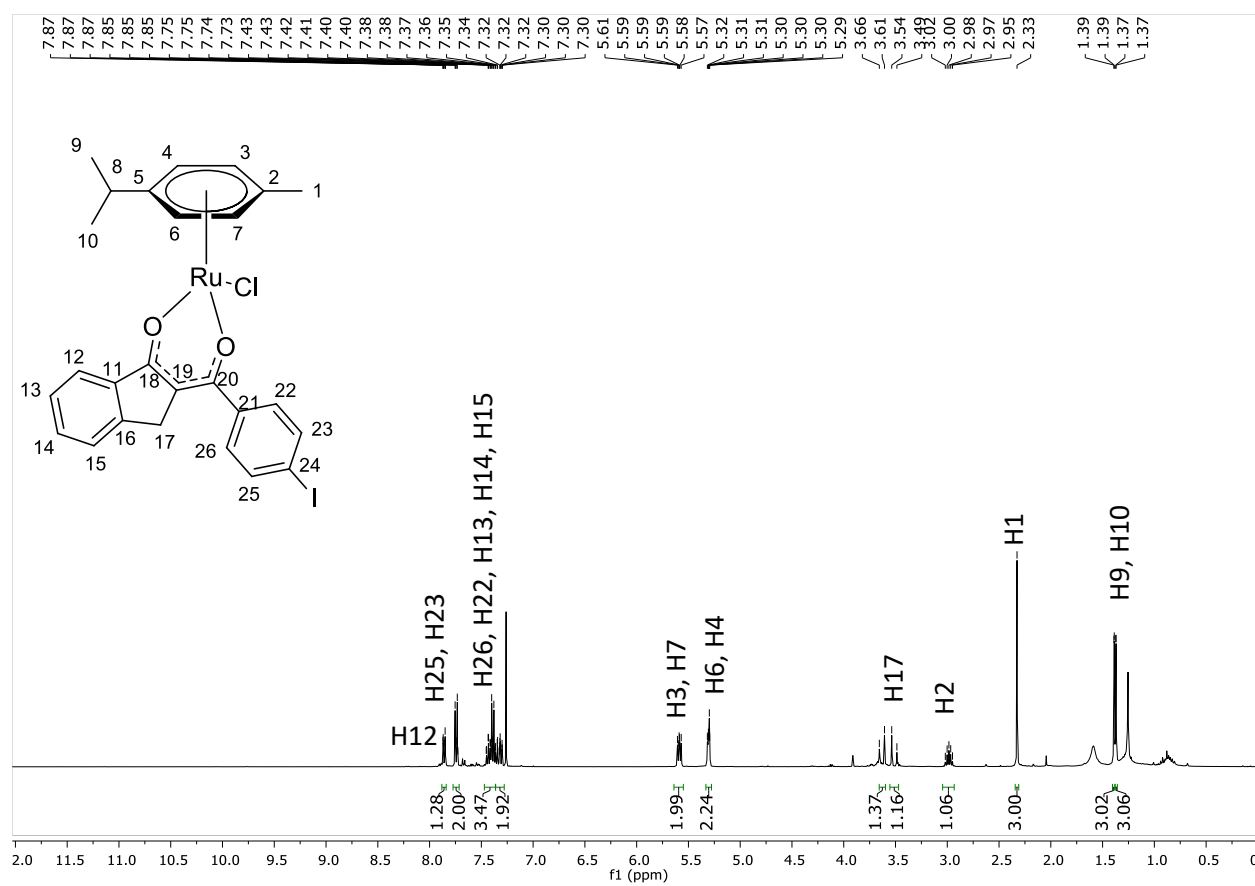

Figure S15:  $^{13}\text{C}$ -NMR spectrum of complex **2b** in  $\text{CDCl}_3$  400 MHz:

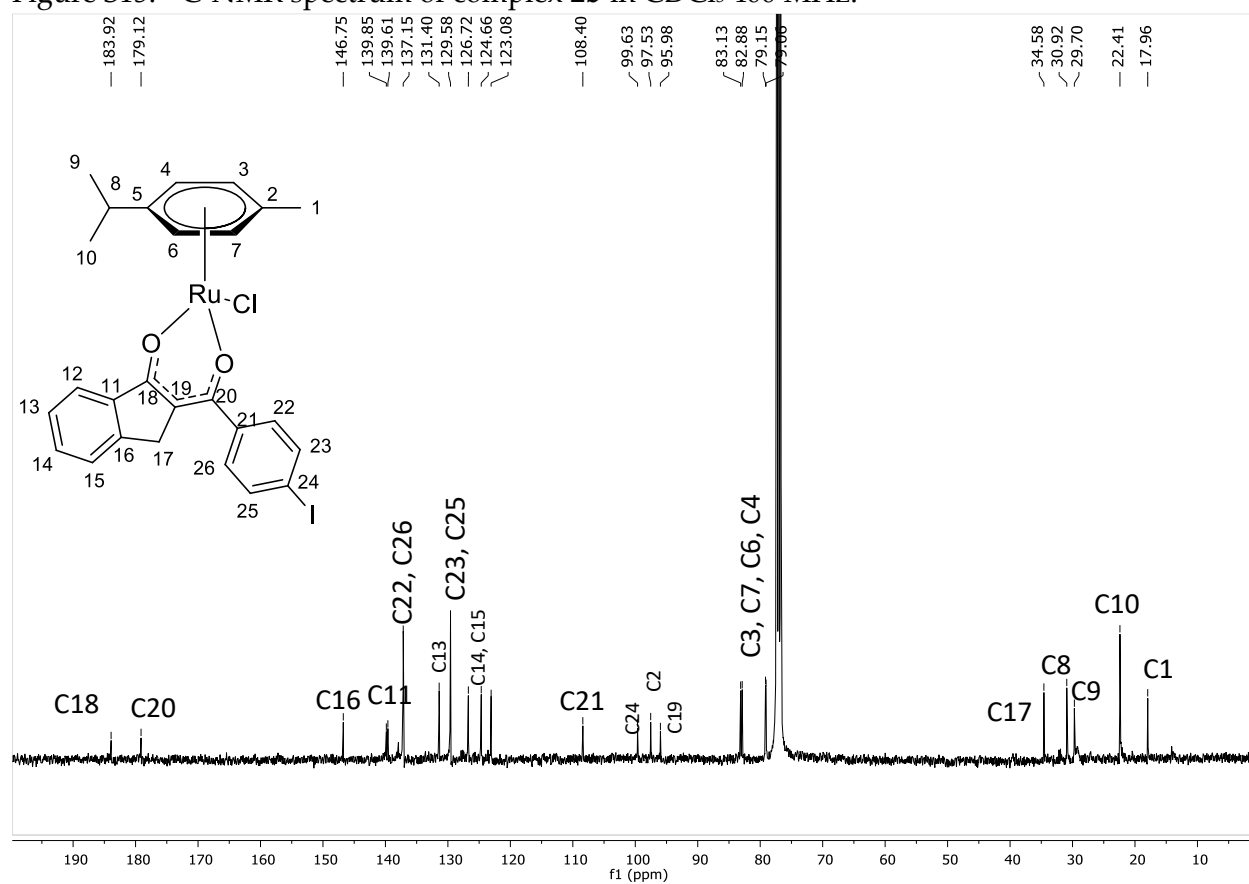

Figure S16: IR spectrum of complex **2c**.

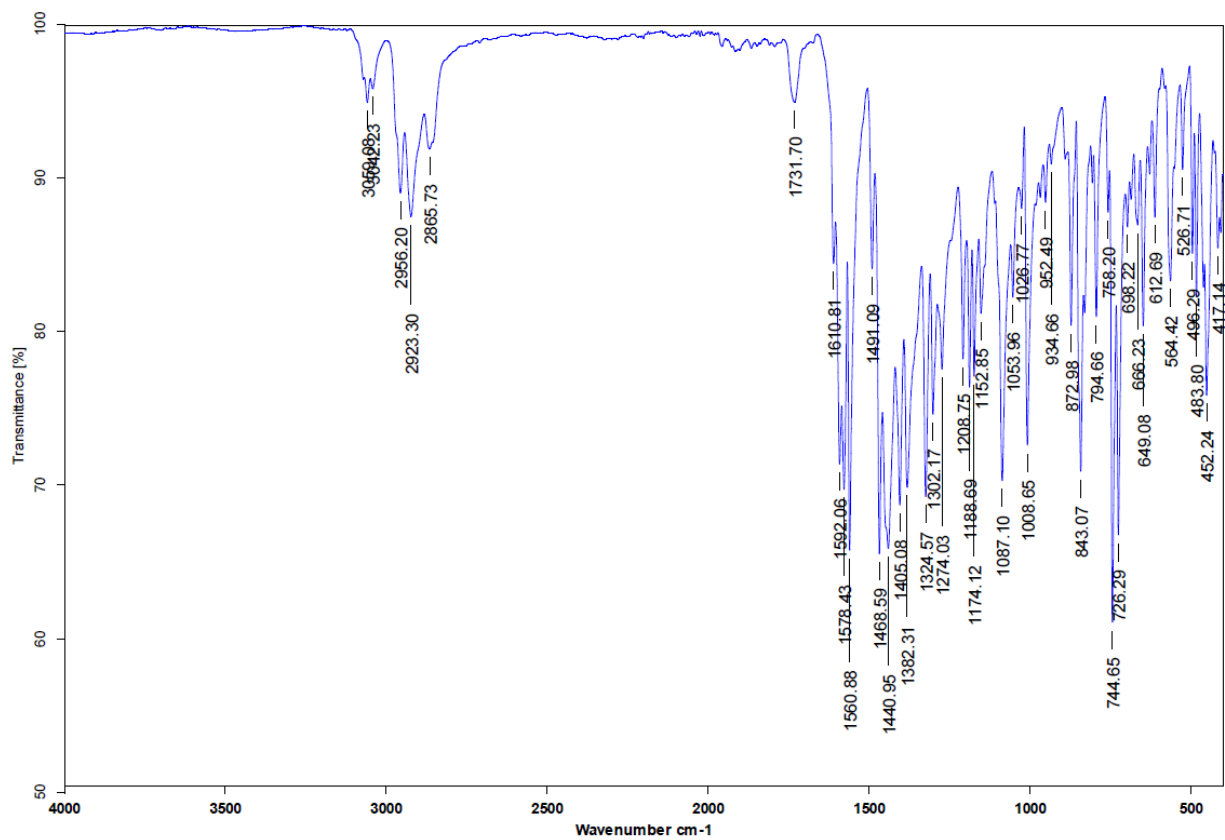

Figure S17: MS spectrum of complex **2c**.

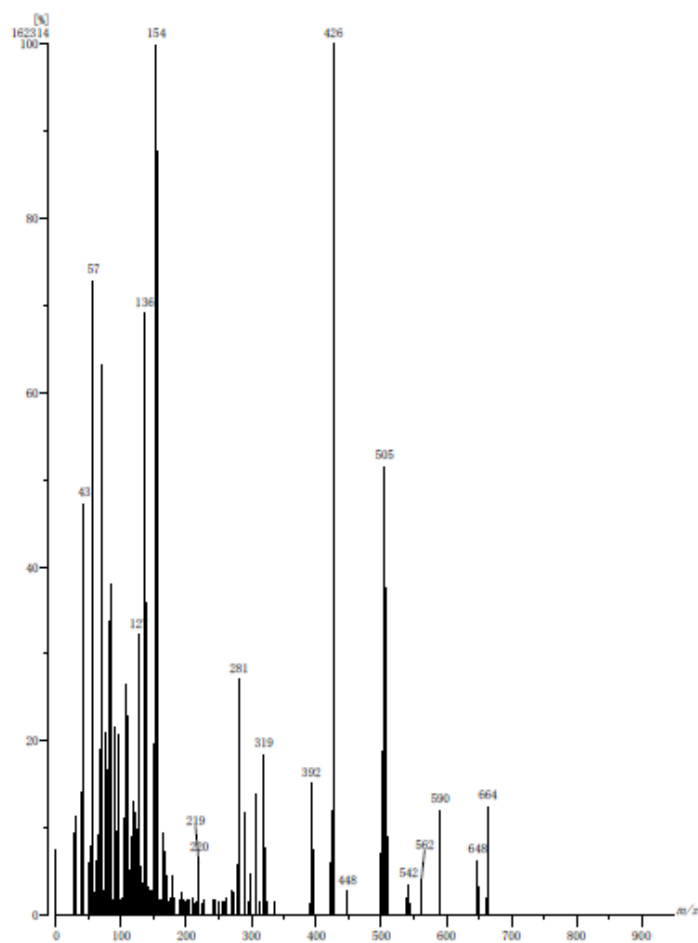

Figure S18: HRMS of complex **2c**.

Inlet : Direct      Ion Mode : FAB+  
 RT : 1.58 min      Scan# : (34,38)  
 Elements : C 26/0, H 30/0, Cl 2/0, O 2/0, Ru 1/0  
 Mass Tolerance : 1000ppm, 10mmu if  $m/z > 10$   
 Unsaturation (U.S.) : 0.0 – 30.0

|   | Observed $m/z$  | Int%            |      |    |    |    |   |    |
|---|-----------------|-----------------|------|----|----|----|---|----|
|   | 540.0201        | 4.00            |      |    |    |    |   |    |
|   | Estimated $m/z$ | Err [ppm / mmu] | U.S. | C  | H  | Cl | O | Ru |
| 1 | 540.0197        | +0.8 / +0.4     | 14.5 | 26 | 24 | 2  | 2 | 1  |

Figure S19:  $^1\text{H}$ -NMR spectrum of **2c** in  $\text{CDCl}_3$  400 MHz:

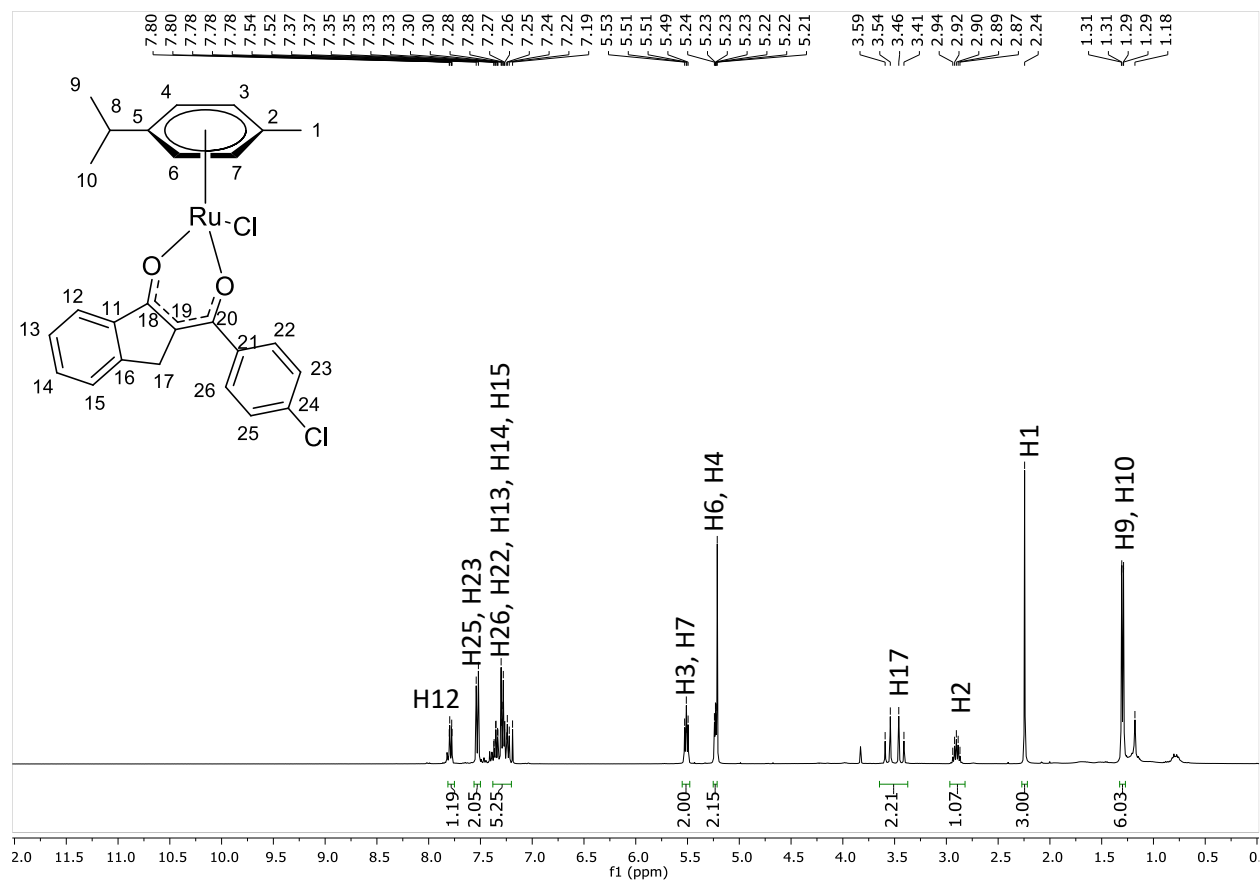



Figure S20:  $^{13}\text{C}$ -NMR spectrum of **2c** in  $\text{CDCl}_3$  400 MHz:

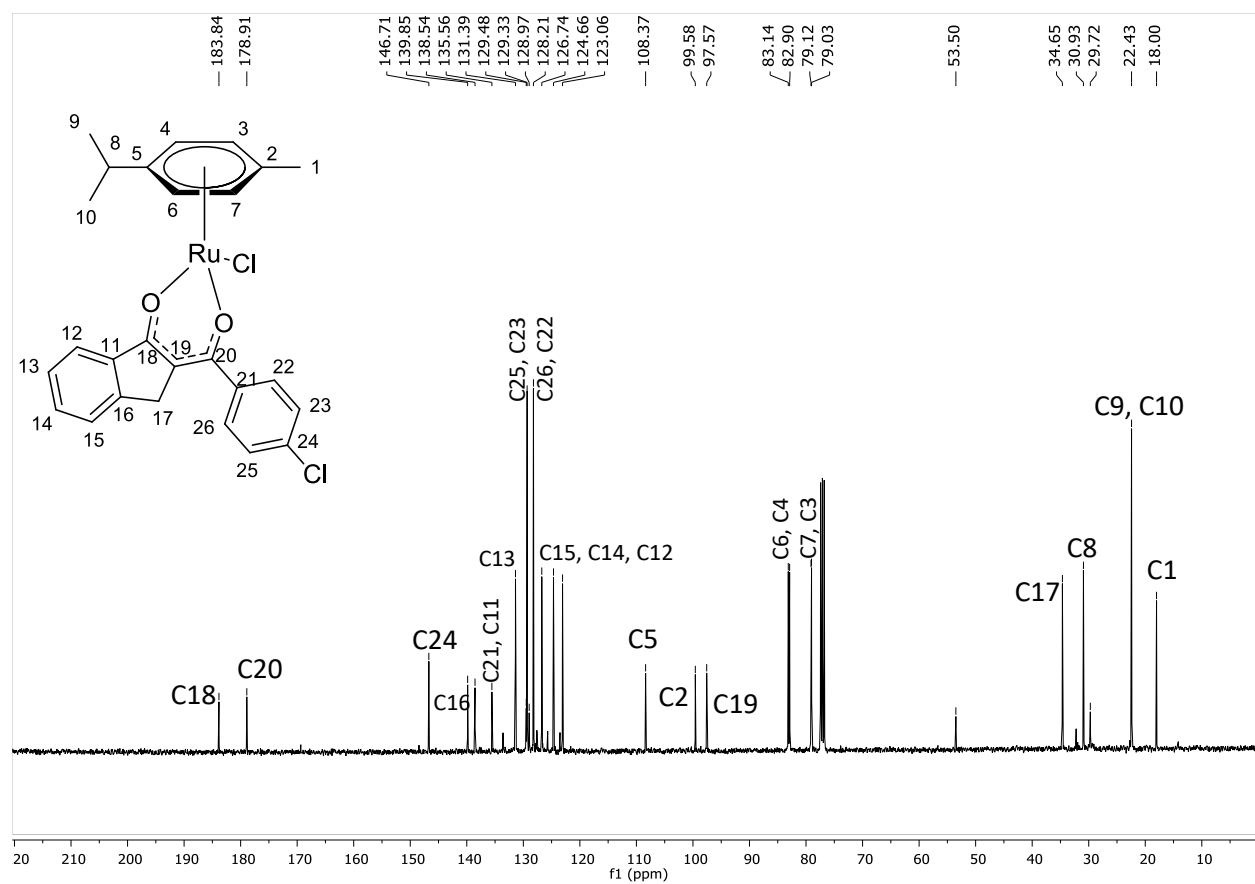

Figure S21: HSQC 2D spectrum of complex **2c**.

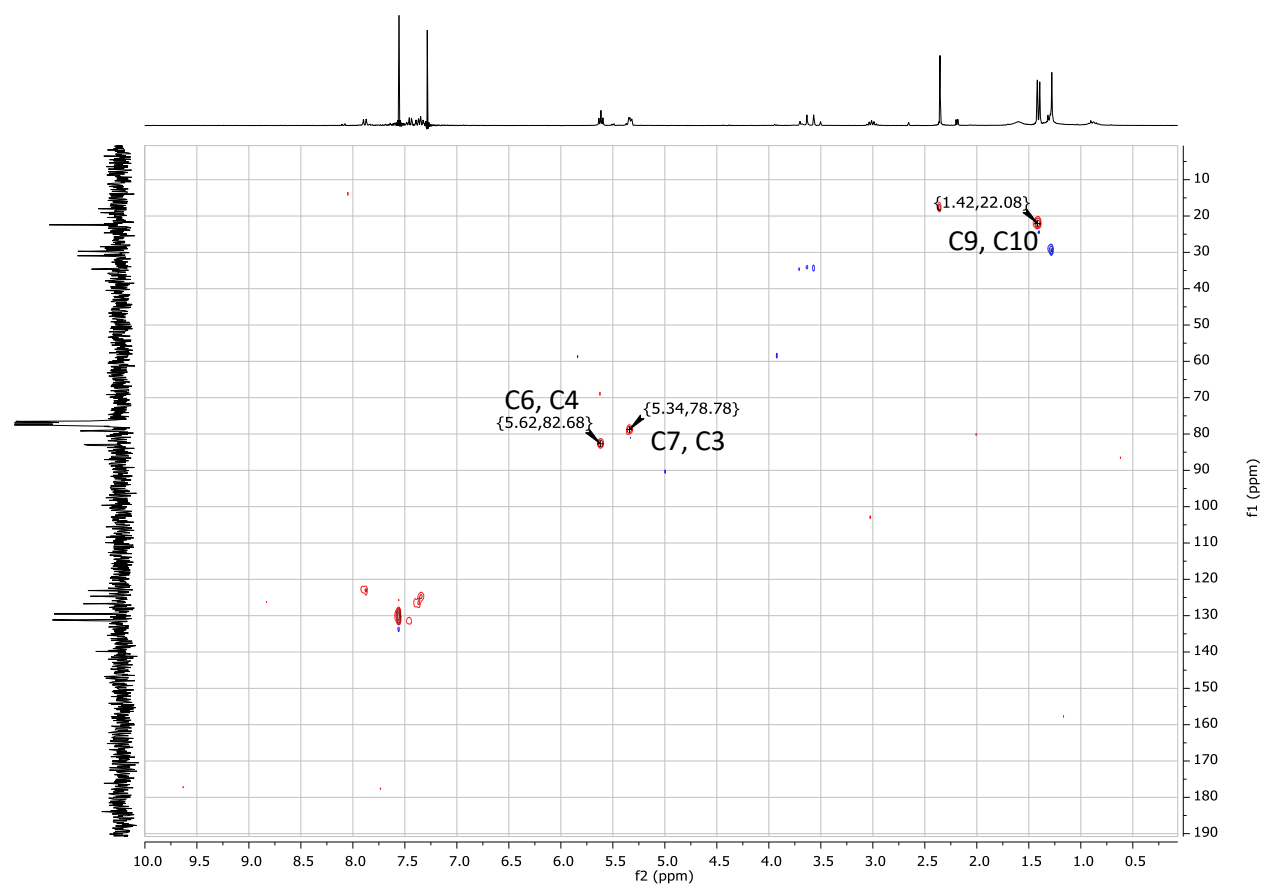

Figure S22: FTIR spectrum of complex **2d**.

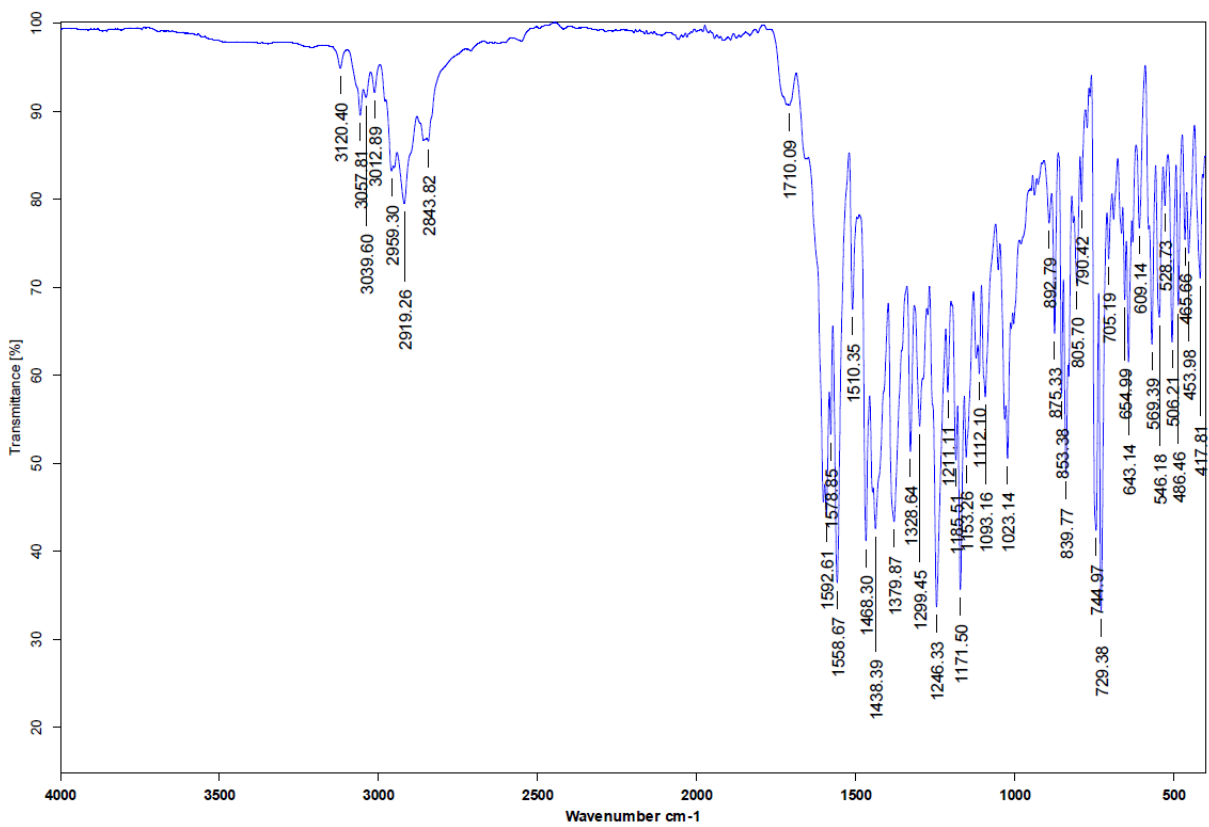

Figure S23: MS spectrum of complex **2d**.

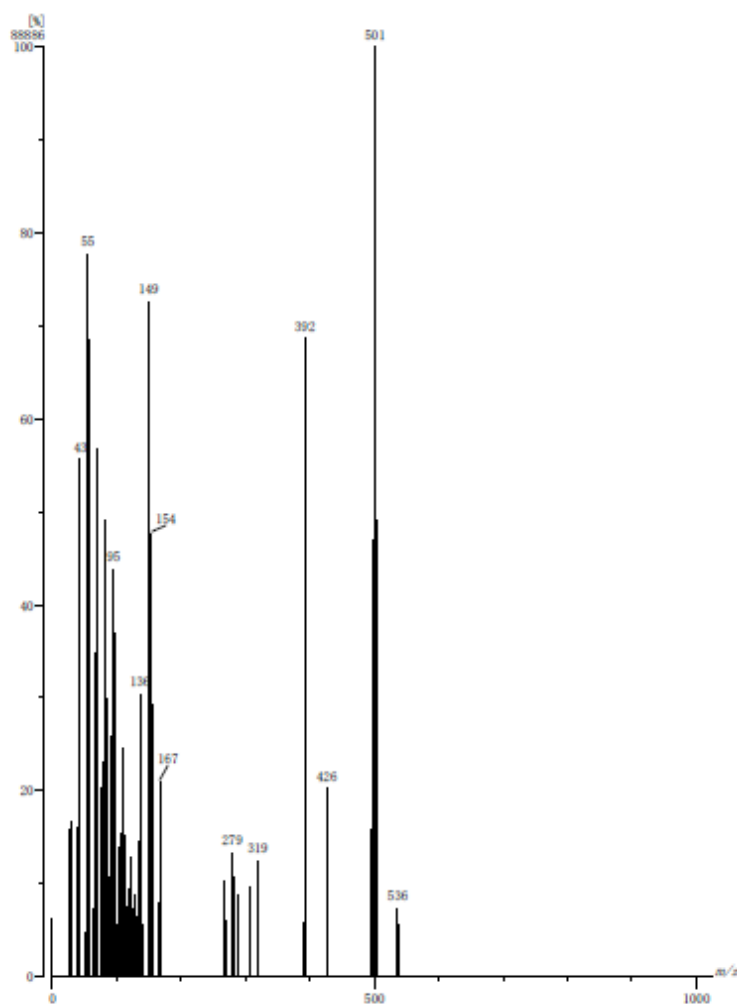

Figure S24: HRMS of complex **2d**.

Inlet : Direct      Ion Mode : FAB+  
 RT : 0.19 min      Scan# : (5,9)  
 Elements : C 27/0, H 30/0, Cl 1/0, O 3/0, Ru 1/0  
 Mass Tolerance : 1000ppm, 5mmu if  $m/z > 5$   
 Unsaturation (U.S.) : 0.0 – 30.0

|   |               |                 |      |    |    |    |   |    |
|---|---------------|-----------------|------|----|----|----|---|----|
|   | Observed m/z  | Int%            |      |    |    |    |   |    |
|   | 536.0672      | 1.49            |      |    |    |    |   |    |
|   | Estimated m/z | Err [ppm / mmu] | U.S. | C  | H  | Cl | O | Ru |
| 1 | 536.0692      | -3.8 / -2.0     | 14.5 | 27 | 27 | 1  | 3 | 1  |

Figure S25:  $^1\text{H}$ -NMR spectrum of complex **2d** in  $\text{CDCl}_3$  400 MHz:

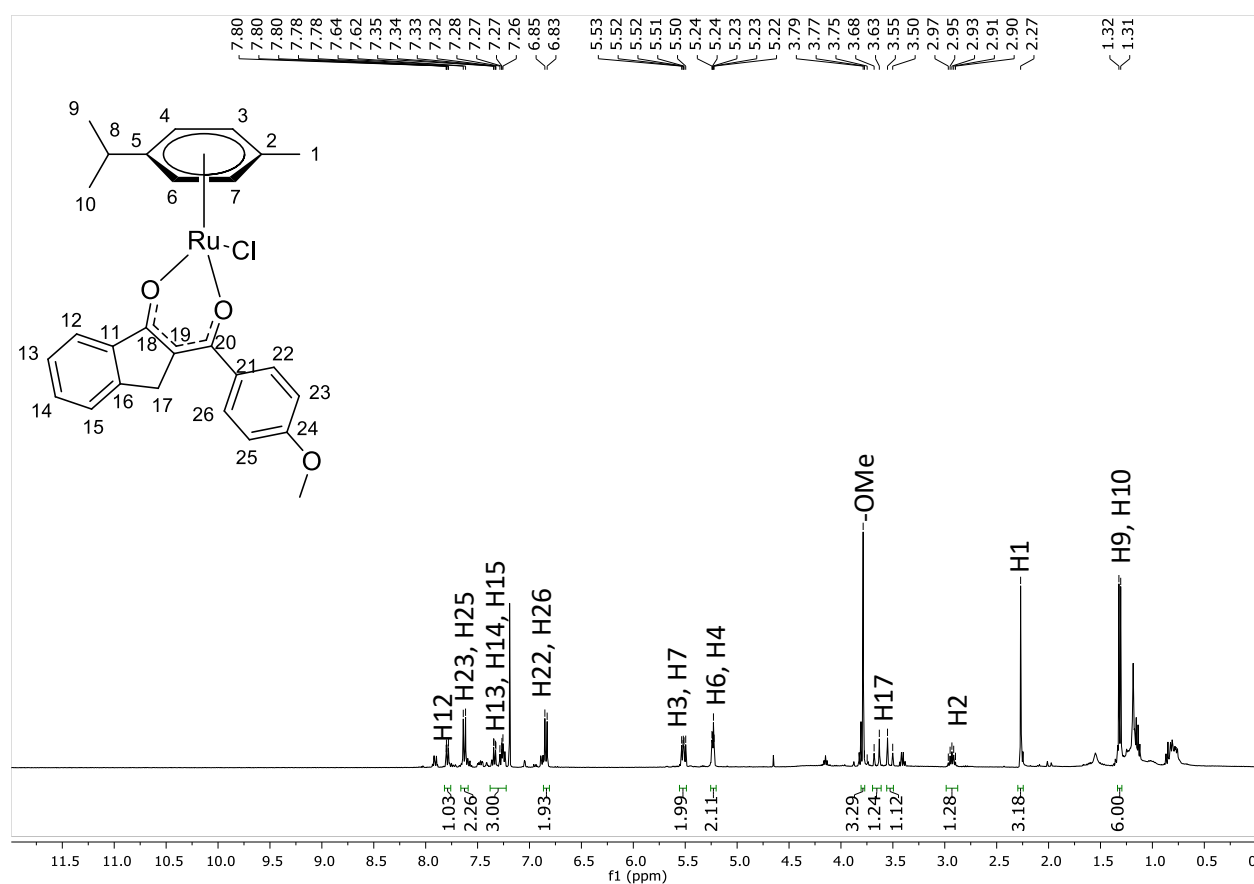

Figure S26:  $^{13}\text{C}$ -NMR spectrum of **2d** in  $\text{CDCl}_3$  400 MHz:

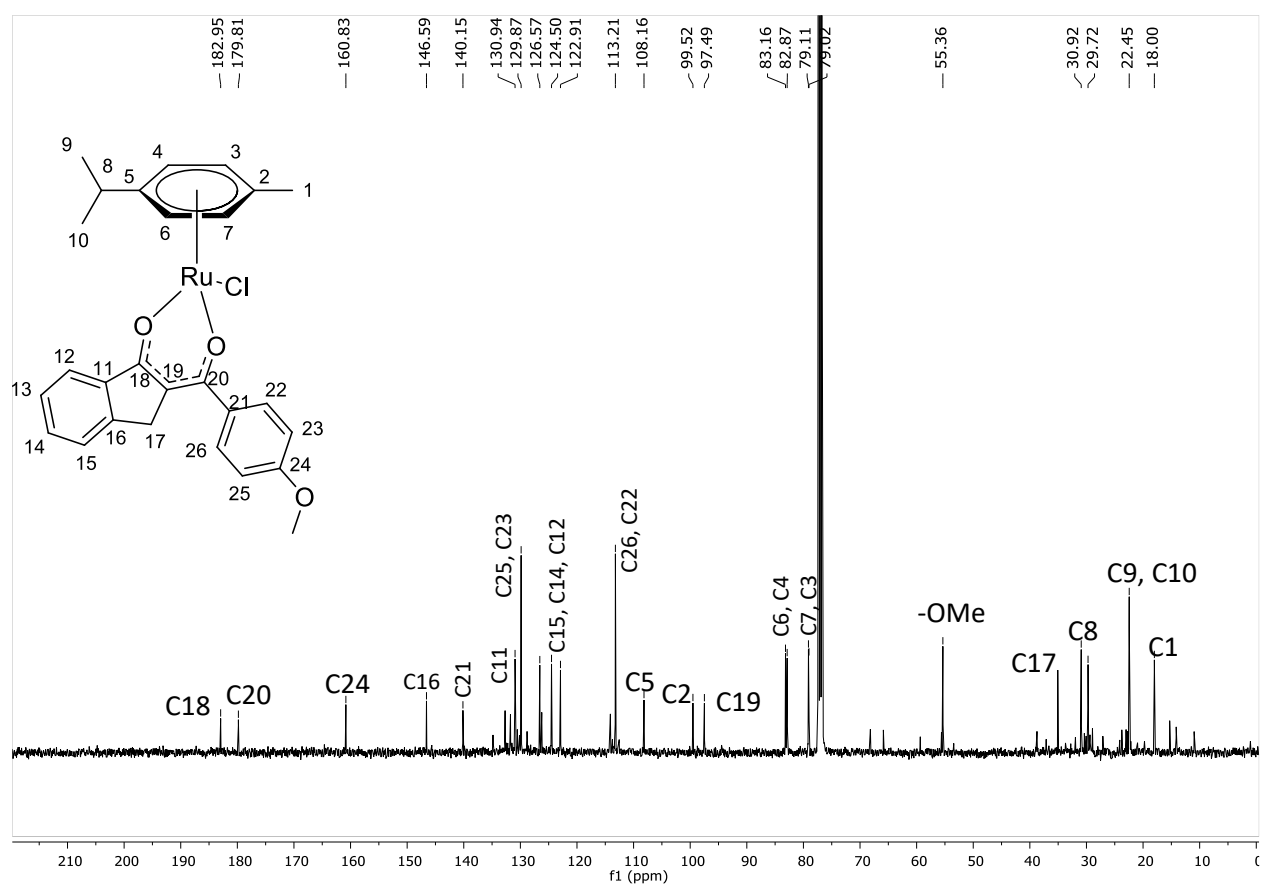

Figure S27: FTIR spectrum of complex **2e**.

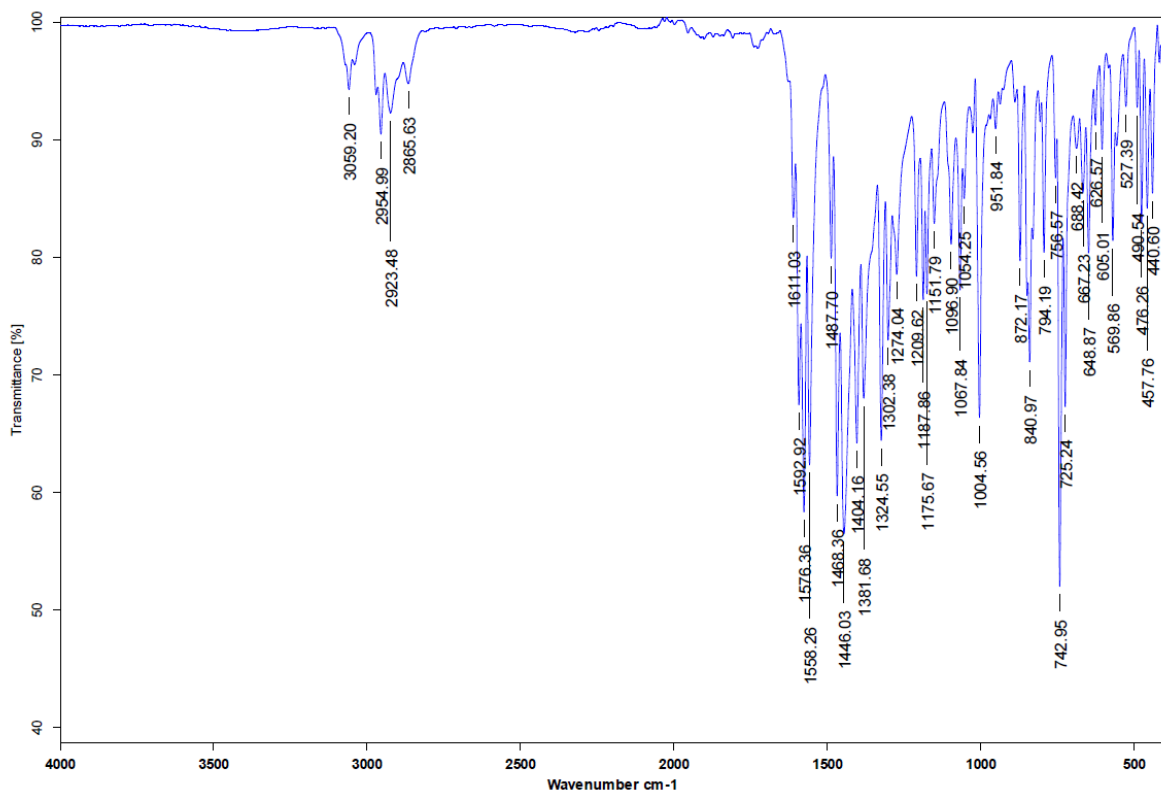

Figure S28: MS spectrum of complex **2d**.

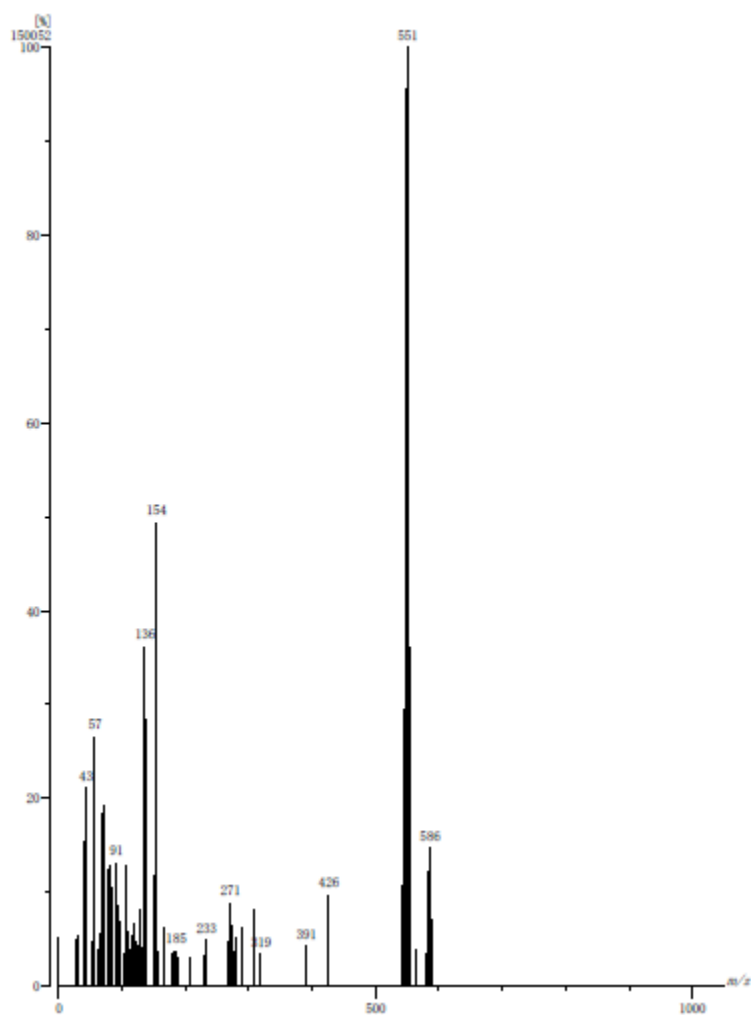

Figure S29: HRMS of complex **2e**.

Inlet : Direct      Ion Mode : FAB+  
 RT : 1.29 min      Scan# : (27,28)  
 Elements : C 26/0, H 26/0, Br 1/0, Cl 1/0, O 2/0, Ru 1/0  
 Mass Tolerance : 1000ppm, 10mmu if  $m/z > 10$   
 Unsaturation (U.S.) : 0.0 – 30.0

|   | Observed $m/z$  | Int%            |      |    |    |    |    |   |    |  |
|---|-----------------|-----------------|------|----|----|----|----|---|----|--|
|   | 583.9691        | 2.90            |      |    |    |    |    |   |    |  |
|   | Estimated $m/z$ | Err [ppm / mmu] | U.S. | C  | H  | Br | Cl | O | Ru |  |
| 1 | 583.9692        | -0.1 / -0.1     | 14.5 | 26 | 24 | 1  | 1  | 2 | 1  |  |



Figure S30:  $^1\text{H}$ NMR spectrum of complex **2e**.

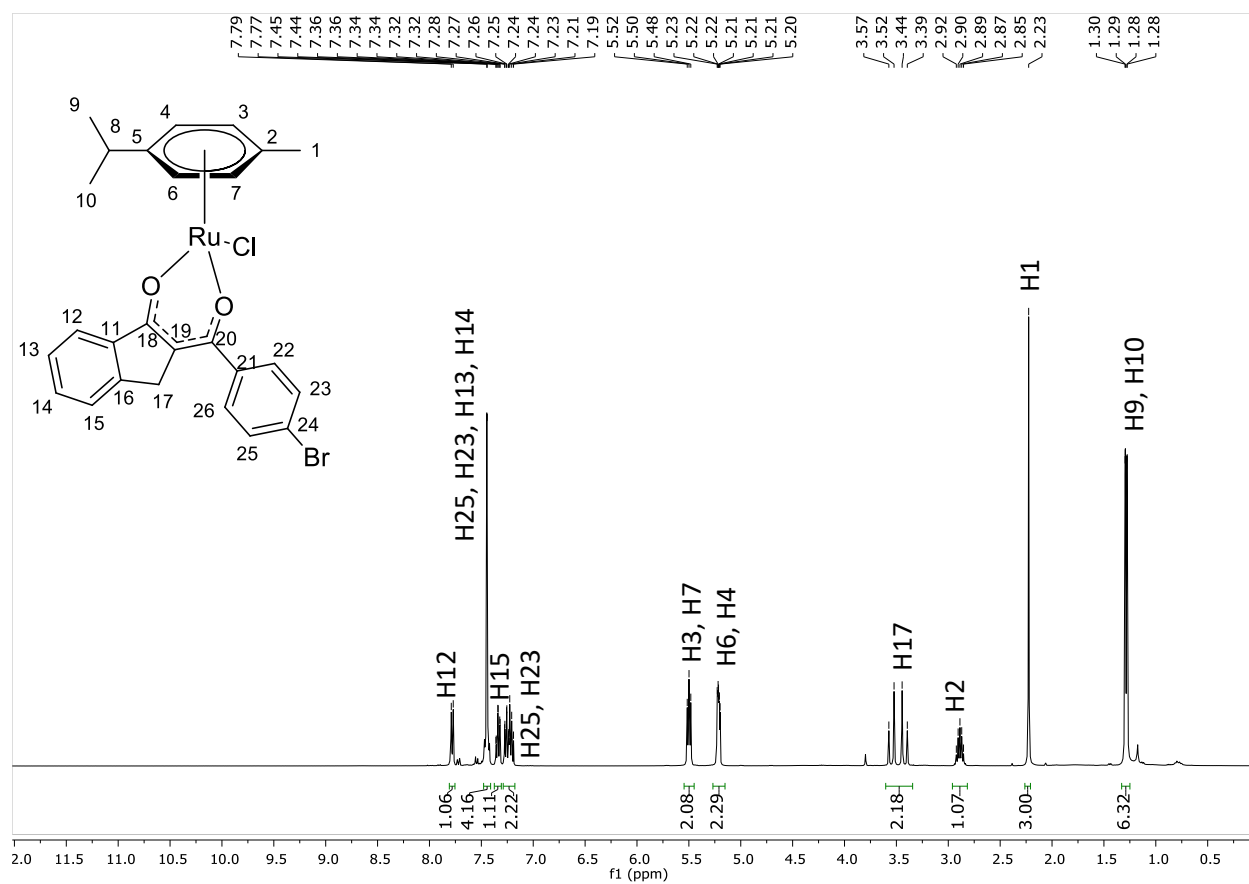

Figure S31:  $^{13}\text{C}$ NMR spectrum of complex **2e**.

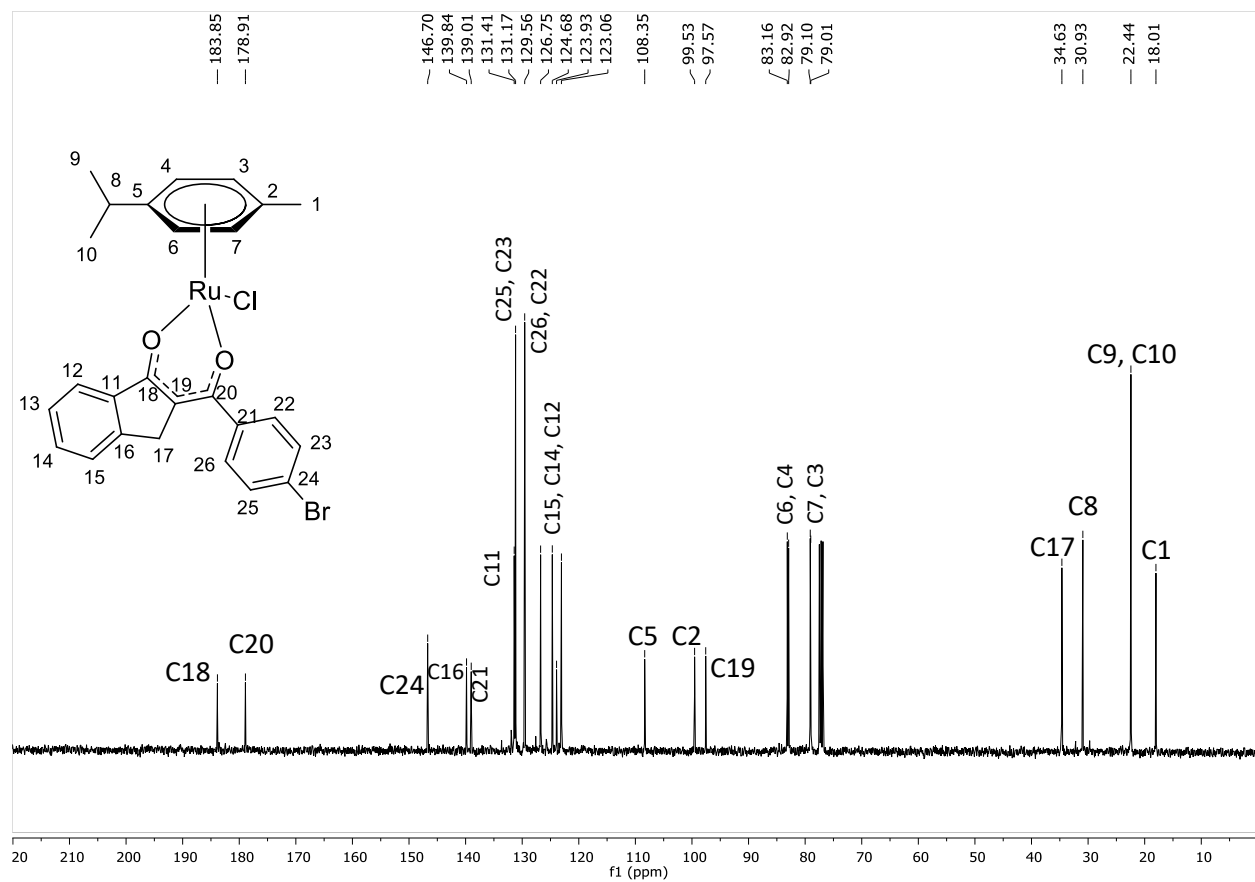

Figure S32: HSQC 2D spectrum of complex 2e in CDCl<sub>3</sub>.

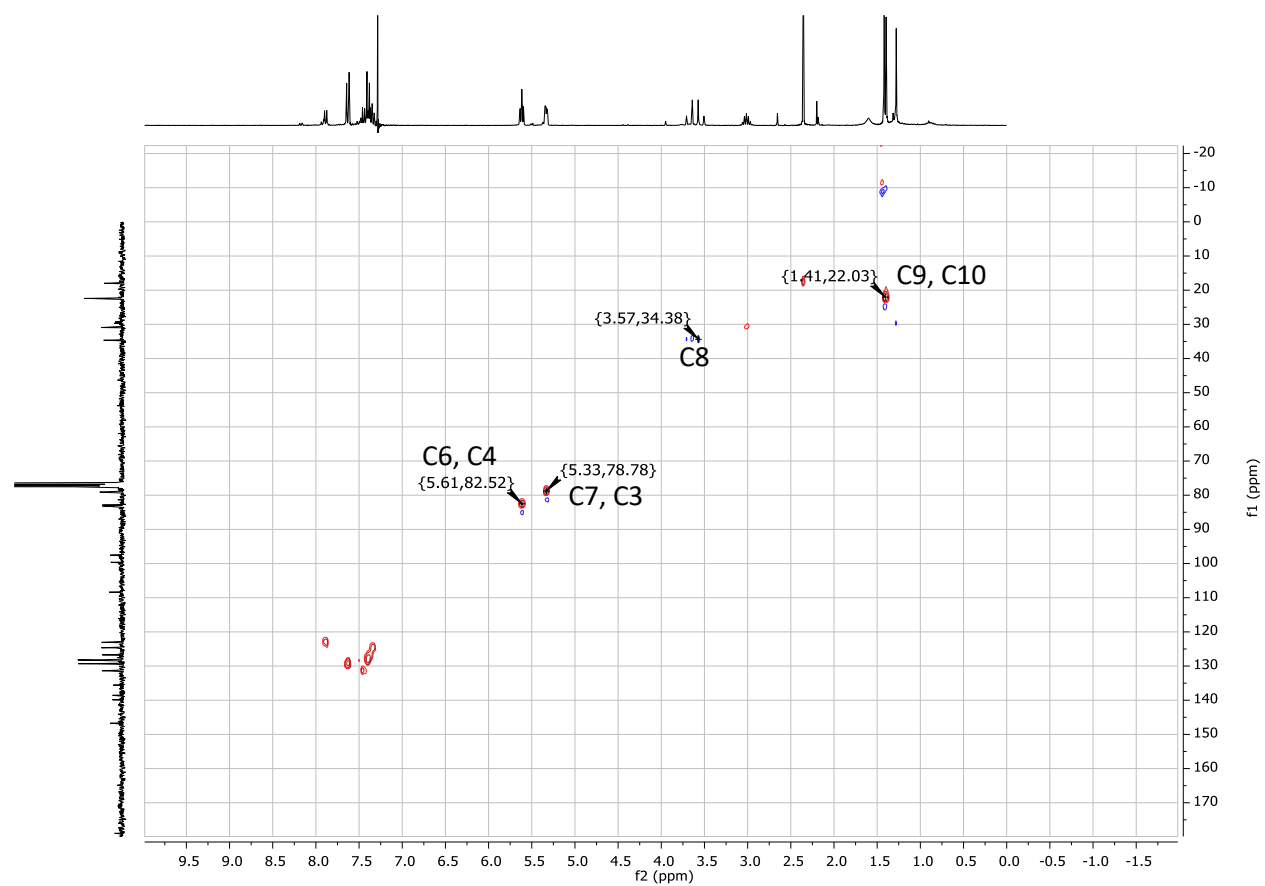

# Synthesis of new ruthenium complexes and their exploratory study as organic semiconductors

Ricardo Ballinas-Indilí <sup>1</sup>, María Elena Sánchez-Vergara <sup>2\*</sup>, Saulo C. Rosales-Amezcu <sup>3</sup>, Joaquín André Hernández Méndez <sup>2</sup>, Byron López-Mayorga <sup>4</sup>, René Miranda Ruvalcaba <sup>1</sup>, and Cecilio Álvarez-Toledano <sup>3</sup>

<sup>1</sup> Departamento de Ciencias Químicas, Facultad de Estudios Superiores Cuautitlán Campo 1, Universidad Nacional Autónoma de México, Avenida 1o de Mayo s/n, Colonia Santa María las Torres, Cuautitlán Izcalli 54740, Mexico; mirruv@yahoo.com.mx (R.M.-R.)

<sup>2</sup> Facultad de Ingeniería, Universidad Anáhuac México, Av. Universidad Anáhuac 46, Col. Lomas Anáhuac, Huixquilucan 52786, Mexico

<sup>3</sup> Instituto de Química, Universidad Nacional Autónoma de México, Circuito Exterior s/n, Ciudad Universitaria, Mexico City 04510, Mexico; cecilio@unam.mx (C.Á.-T.)

<sup>4</sup> Escuela de Química, Facultad de Ciencias Químicas y Farmacia, Universidad de San Carlos de Guatemala, 11 avenida, Ciudad de Guatemala 01012, Guatemala, byron.lopez@profesor.usac.edu.gt (B.L.-M)

\* Correspondence: elena.sanchez@anahuac.mx

## Content

|                                                    |          |
|----------------------------------------------------|----------|
| Complex <b>2a</b> (FTIR KBr and Hybrid Film .....  | IR1-IR2  |
| Complex <b>2b</b> (FTIR KBr and Hybrid Film) ..... | IR3-IR4  |
| Complex <b>2c</b> (FTIR KBr and Hybrid Film) ..... | IR5-IR6  |
| Complex <b>2d</b> (FTIR KBr and Hybrid Film) ..... | IR7-IR8  |
| Complex <b>2e</b> (FTIR KBr and Hybrid Film) ..... | IR9-IR10 |

Figure IR1: FTIR spectrum of complex **2a** (KBr).

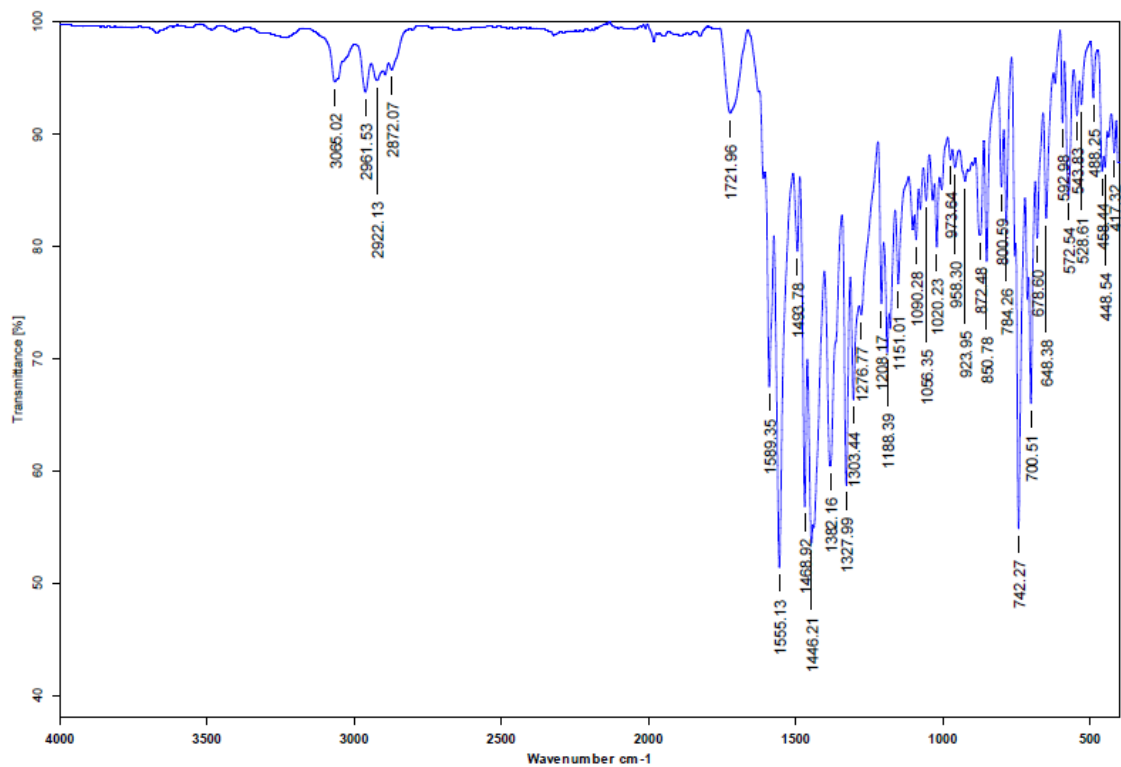

Figure IR2: FTIR spectrum of complex **2a** (hybrid film).

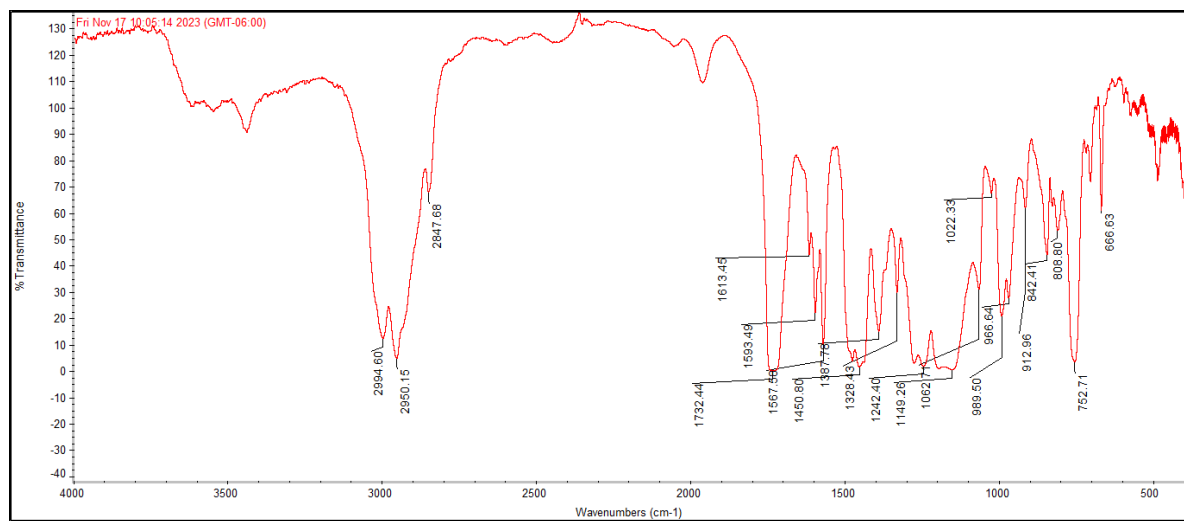

Figure IR3: FTIR spectrum of complex **2b** (KBr).

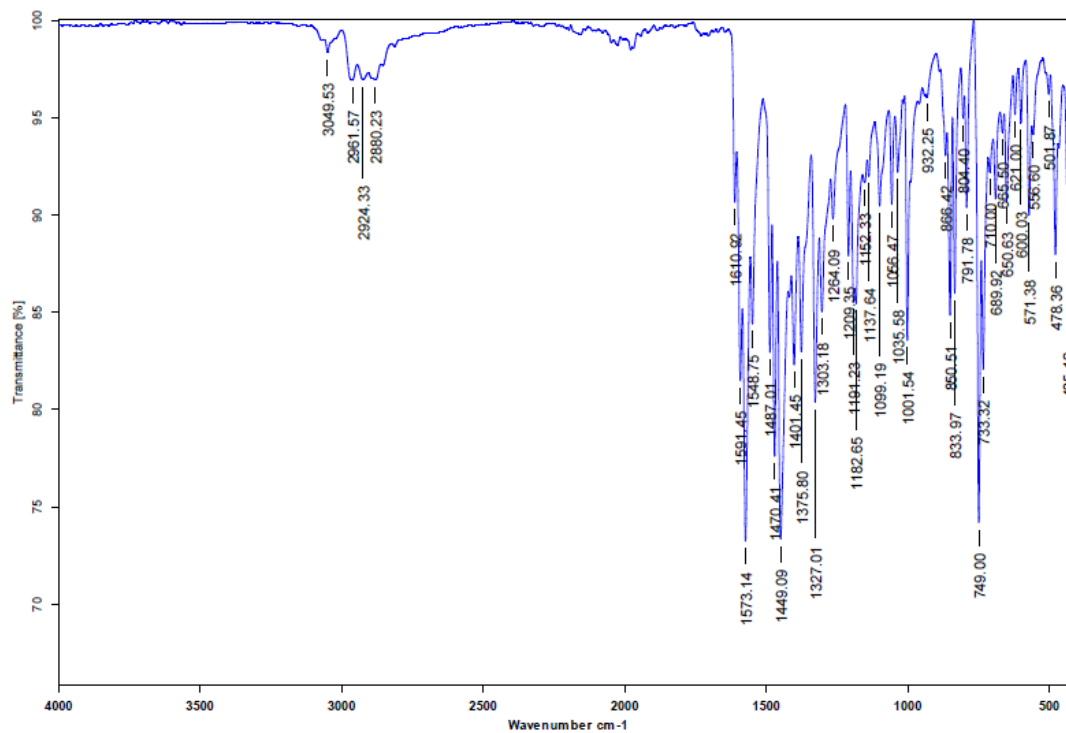

Figure IR4: FTIR spectrum of complex **2b** (hybrid film).

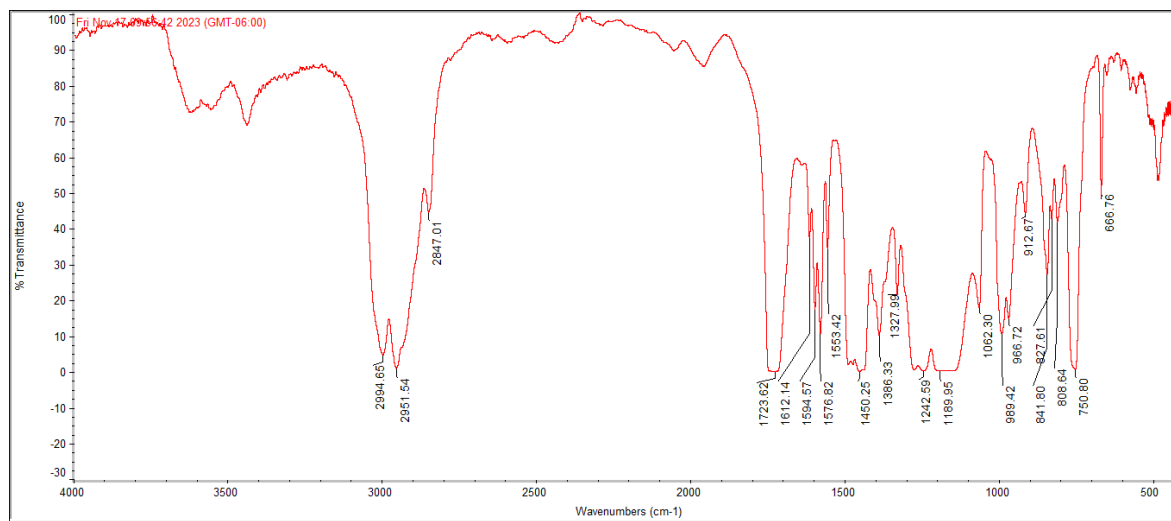

Figure IR5: IR spectrum of complex **2c** (KBr).

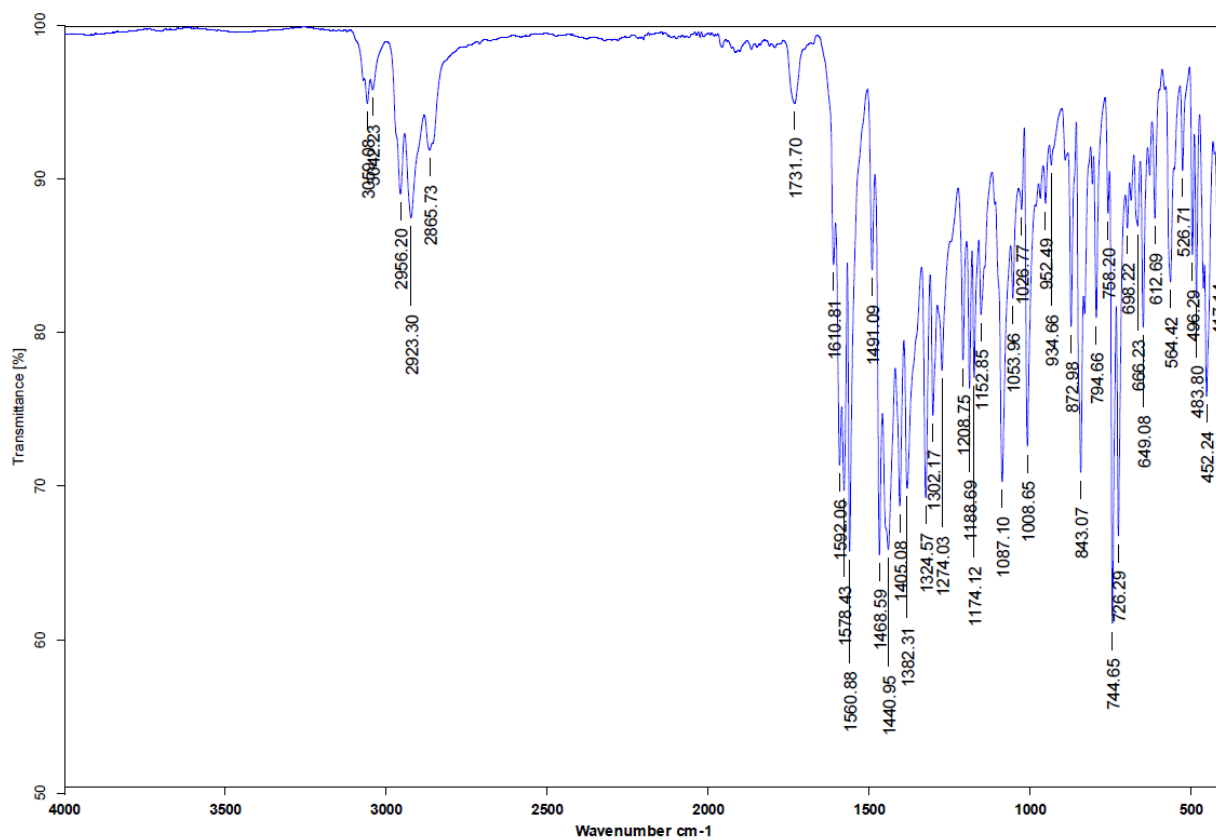

Figure IR6: FTIR spectrum of complex **2c** (hybrid film).

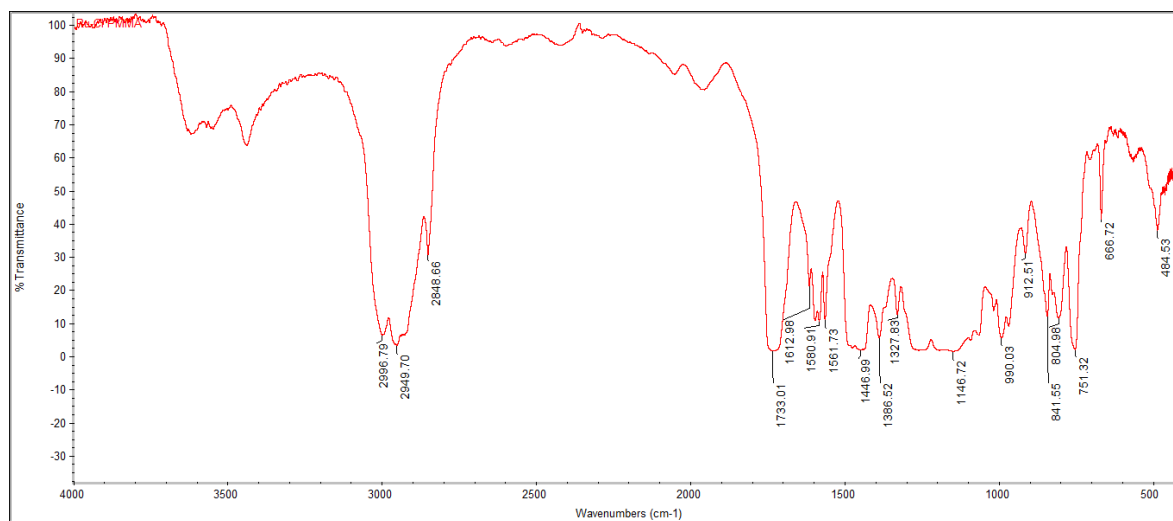

Figure IR7: FTIR spectrum of complex **2d** (KBr).

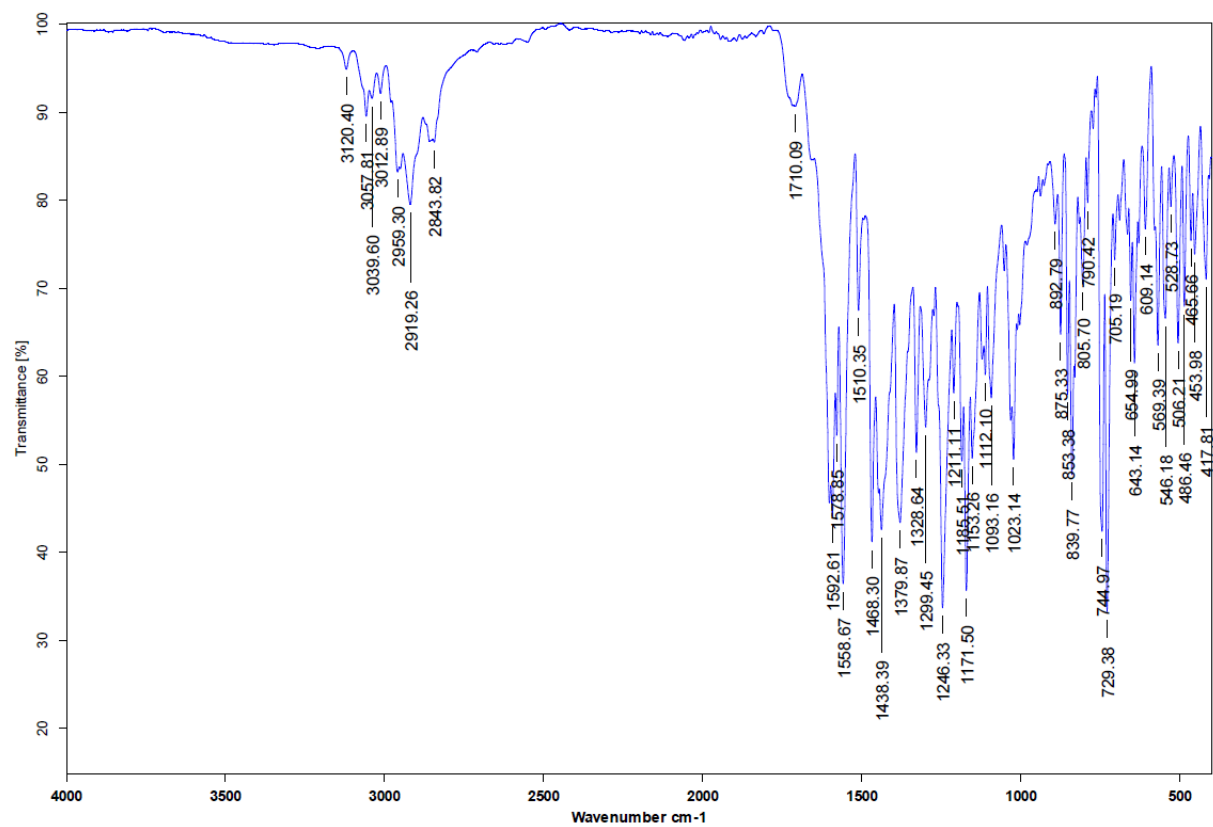

Figure IR8: FTIR spectrum of complex **2d** (hybrid film).

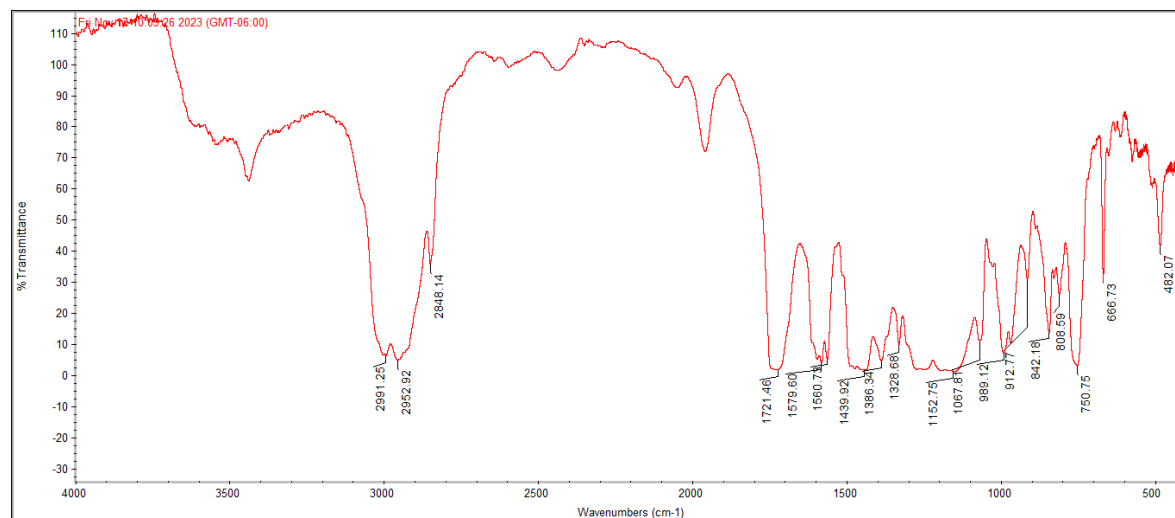



Figure IR9: FTIR spectrum of complex **2e** (KBr).

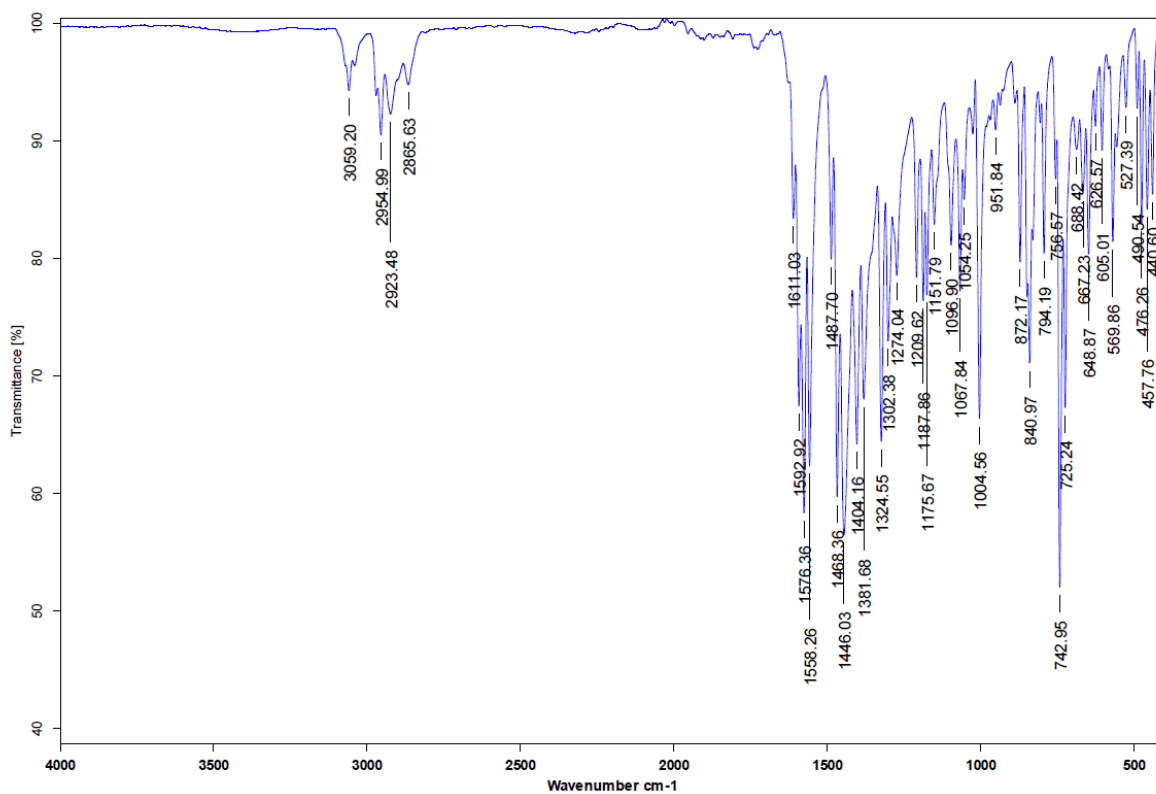

Figure IR10: FTIR spectrum of complex **2e** (hybrid film).

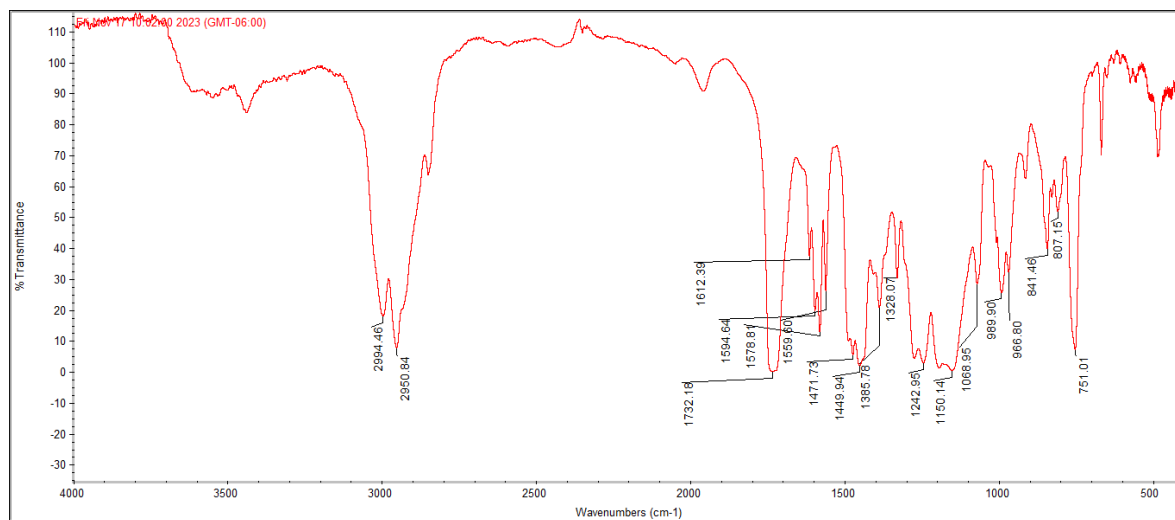

Supplement: s1 [file s1]
